# Supplementary material for: Fatty Acids Enhance the Maturation of Cardiomyocytes Derived from Human Pluripotent Stem Cells
Source: PubMed Central journal article supplement — Stem Cell Reports. 2019 Sep 26;13(4):657–68. doi: 10.1016/j.stemcr.2019.08.013 (PMC6829750; doi:10.1016/j.stemcr.2019.08.013), 2019-09-26
Supplement: mmc1.pdf [file mmc1.pdf]

**Stem Cell Reports, Volume 13**

**Supplemental Information**

**Fatty Acids Enhance the Maturation of Cardiomyocytes Derived from Human Pluripotent Stem Cells**

**Xiulan Yang, Marita L. Rodriguez, Andrea Leonard, Lihua Sun, Karin A. Fischer, Yuliang Wang, Julia Ritterhoff, Limei Zhao, Stephen C. Kolwicz Jr., Lil Pabon, Hans Reinecke, Nathan J. Sniadecki, Rong Tian, Hannele Ruohola-Baker, Haodong Xu, and Charles E. Murry**

1 SUPPLEMENTAL INFORMATION

2 **Figures and Legends**

3

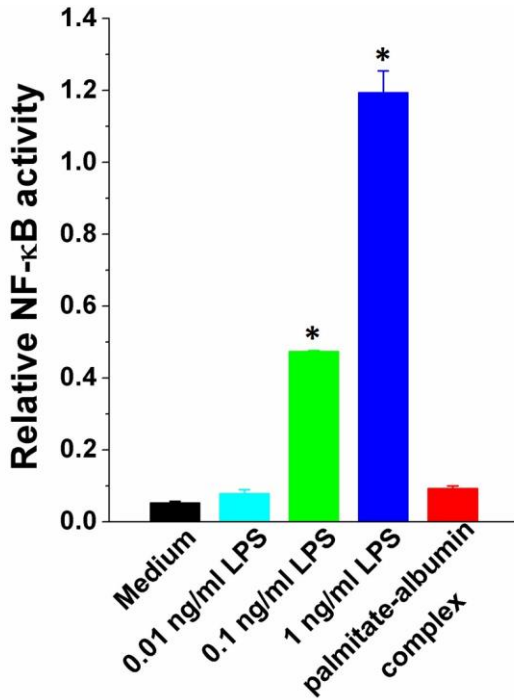

4

5

6 Figure S1. House-made palmitate-albumin complex is endotoxin-free, related to Results 2.1. HEK 293  
7 cells were treated with medium only or medium containing 0.01 ng/ml, 0.1 ng/ml, 1 ng/ml LPS or the self-  
8 made palmitate-albumin complexes. No significant endotoxin activity was observed in the medium  
9 containing palmitate-albumin complexes compared with medium only. The assay was performed three  
10 times on three different batches of palmitate-albumin complex. \* P<0.05 vs medium only. Data are  
11 represented as mean ± SEM.

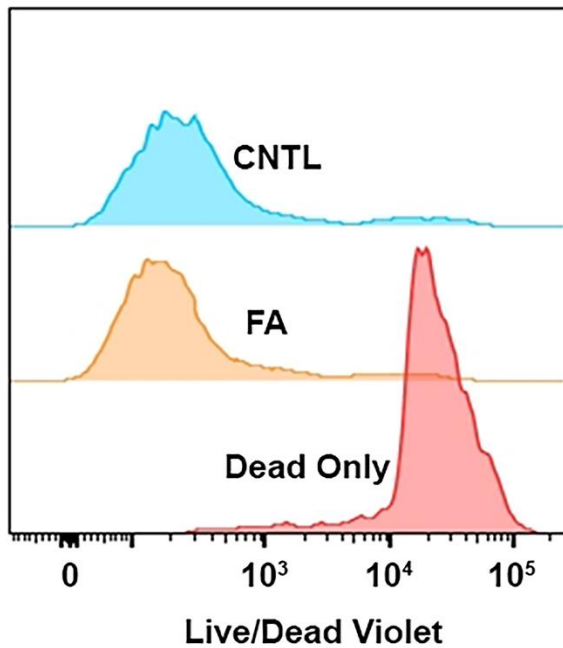

12

13 Figure S2. Fatty acids supplement does not lead to cell toxicity, related to Results 2.1. Live-dead assay  
 14 showed there was no difference in cell death between control and fatty acids-treated hPSC-CMs, two  
 15 weeks after treatment. The experiments were performed with cardiomyocytes from three different  
 16 cardiomyocyte differentiation runs and similar results were observed.

17

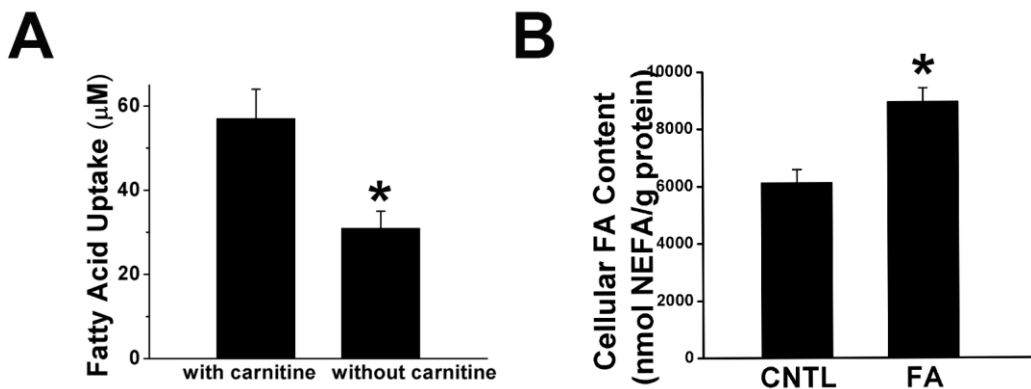

18

19 Figure S3. Cellular fatty acids uptake and cellular fatty acid content, related to Results 2.1. Panel A  
 20 showed cellular fatty acids uptake with or without carnitine added to the medium. B shows the intracellular

21 fatty acid content with and without FA treatment. Experiments were performed with cardiomyocytes from  
 22 three different differentiation runs, \* P< 0.05 between groups. Data are represented as mean ± SEM.

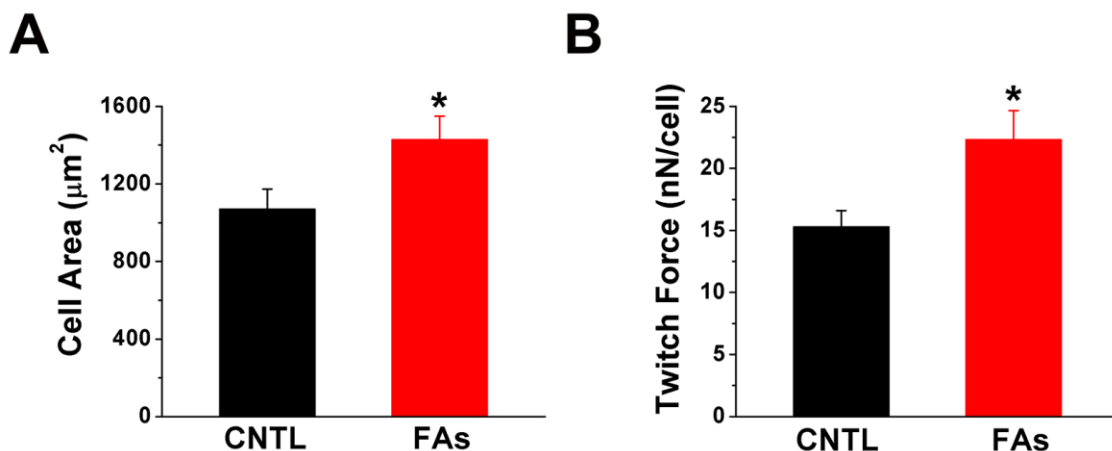

23  
 24 Figure S4. The effect of fatty acids treatment on cardiomyocytes derived from RUES cells, related to  
 25 Figure 1 and Figure 3. (A) Fatty acids treatment leads to hypertrophy of cardiomyocytes-derived from  
 26 RUES2 embryonic stem line, n>170 from 3 different cardiomyocyte differentiation runs. Data are  
 27 represented as mean ± SEM. \* P<0.05. (B) Fatty acids treatment significantly increases the contractile  
 28 force of cardiomyocytes-derived from RUES2 embryonic stem line. n = 26 for control hPSC-CMs and n =  
 29 28 for fatty acid-treated hPSC-CMs from 3 different cardiomyocyte differentiation runs. Data are  
 30 represented as mean ± SEM. \* P<0.05 vs. control hPSC-CMs.

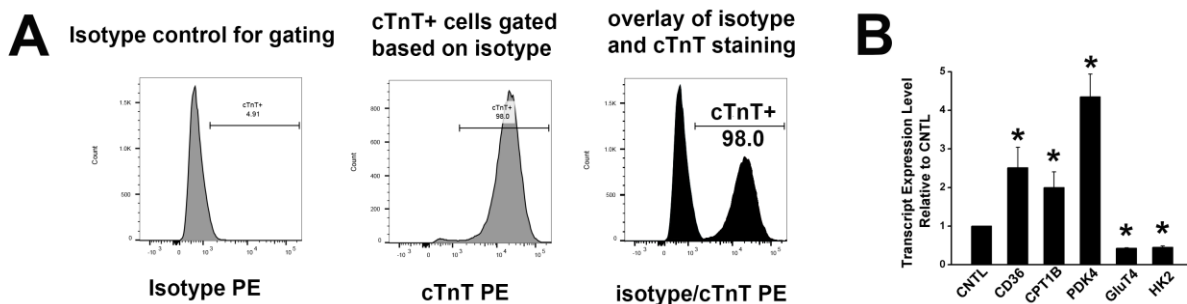

31  
 32 Figure S5. The effect of cardiomyocyte purity on gene expression levels, related to Figure 6. A shows a  
 33 representative flow cytometry analysis for a cardiac differentiation run which has a cardiomyocyte purity of  
 34 98%. B shows Q-PCR assay after treating the high purity cardiomyocytes with fatty acids. The  
 35 experiments were performed three times with cardiomyocytes from three different differentiation runs.  
 36 Data are represented as mean ± SEM. \* P<0.05 vs. control hPSC-CMs.

37

38 Table S1. Primer sequences for Q-PCR assay, related to Figure 6.

| Transcripts                    | Forward Primer Sequence | Reverse Primer Sequence |
|--------------------------------|-------------------------|-------------------------|
| <i>HPRT</i>                    | TGACACTGGCAAACAATGCA    | GGTCCTTTTCACCAGCAAGCT   |
| <i>CD36</i>                    | TCTTTCCTGCAGCCCAATG     | AGCCTCTGTTCCAAGTATAGTGA |
| <i>CPT1B</i>                   | ACATCTCTGCCCAAGCTTCC    | ACCATGACTTGAGCACCAGG    |
| <i>PDK4</i>                    | AGAGGTGGAGCATTCTCGC     | ATGTTGGCGAGTCTCACAGG    |
| <i>Glut4</i>                   | CTCGATCCGACTCGGGAAAG    | CGCTGCTGAGGGGGTTC       |
| <i>HK2</i> (Wolf et al., 2011) | CAAAGTGACAGTGGGTGTGG    | GCCAGGTCCTTCACTGTCTC    |

39

40 *HPRT* (hypoxanthine-guanine phosphoribosyltransferase), *CD36* (fatty acid translocase), *CPT1B*  
 41 (Carnitine palmitoyltransferase 1A), *PDK4* (pyruvate dehydrogenase kinase-4), *Glut4* (glucose  
 42 transporter 4), *HK2* (hexokinase 2).

43

44 Table S2. Electrophysiological parameters for control and FA-treated IMR90-CMs, related to Figure 4.

45

|                              | CNTL                | FA-treated           |
|------------------------------|---------------------|----------------------|
| N                            | 24                  | 25                   |
| Beating rate(bpm)            | 124.45 ± 16.55      | 115.24 ± 13.20       |
| dV/dt <sub>max</sub> (V/sec) | 23.55 ± 1.80        | 37.01 ± 5.74*        |
| MDP(mV)                      | -58.28 ± 1.51       | -58.84 ± 1.99        |
| APA(mV)                      | 88.23 ± 3.06        | 90.69 ± 3.75         |
| APD50 (ms)                   | 255.61 ± 41.49      | 281.86 ± 35.21       |
| APD90 (ms)                   | 316.33 ± 46.71      | 343.33 ± 35.52       |
| Cm(pF)                       | 59.56 ± 4.69 (n=14) | 73.73 ± 4.60 (n=15)* |

46

47 N, cell number (from 3 different directed differentiation runs); dV/dt<sub>max</sub>, maximum rate of action potential  
 48 upstroke; MDP, maximum diastolic potential; APA indicates action potential amplitude; APD50, action

49 potential duration measured at 50% repolarization; APD90, action potential duration measured at 90%  
50 repolarization; Cm, membrane capacitance; Data were obtained from 3 different cardiomyocyte  
51 differentiation runs. For control group n = 24 and n = 25 for FA-treated group. \*P<0.05 between control  
52 and FA-treated IMR90-CMs.

## 53 **Supplemental Experimental Procedures**

### 54 **1. Endotoxin assay on the self-made palmitate-albumin complexes**

55 Endotoxin levels in palmitate-albumin complexes were tested by performing HEK293 cell Toll-like  
56 Receptor (TLR4) activation assays (Coats et al., 2011). Briefly, HEK293 cells grown in DMEM 10%FBS  
57 were plated in 96-well plates at a density of  $4 \times 10^4$  cells per well, and transfected the following day with  
58 plasmids bearing fire-fly luciferase, Renilla luciferase, human HATLR4, MD-2 (lymphocyte antigen 96),  
59 and mCD14 by standard calcium phosphate precipitation. Twenty-two hours after transfection, cells were  
60 stimulated with the different samples listed in Figure S1, each in triplicate, for 4 hours at 37°C with the  
61 indicated doses and different concentrations of E.coli lipopolysaccharides (LPS) suspended in DMEM/  
62 5%FBS following stimulation. The transfected HEK293 cells were rinsed with phosphate-buffered saline  
63 and lysed with 50  $\mu$ l of passive lysis buffer (Promega, Madison, WI). Luciferase activity was measured  
64 using the Dual Luciferase Assay Reporter System (Promega, Madison, WI). Data are expressed as  
65 relative NF- $\kappa$ B-activity, which represents the ratio of NF- $\kappa$ B-dependent fire-fly luciferase activity to  $\beta$ -Actin  
66 promoter-dependent Renilla luciferase activity.

67

### 68 **2. Flow cytometry live dead assay**

69 The hPSC-CMs were treated with fatty acids for two days and the lipid toxicity was determined by  
70 live/dead fixable dead cell stain kit from Invitrogen. The control dead cells were obtained by putting the  
71 cells into 60°C water bath for half an hour.

72

### 73 **3. Fatty acid uptake and cellular fatty acid content**

74 The hPSC-CMs were treated with fatty acids for two days and cellular fatty acids uptake was measured  
75 using the HR Series NEFA-HR (2) kit from Wako Life Sciences as mentioned in the methods part of the  
76 main text. The hPSC-CMs were treated with fatty acids for two weeks and cells were homogenized and  
77 FA content was measured as described in the methods part of the main text.

78

### 79 **4. Cellular morphology and contractile force changes after FA exposure in cardiomyocytes-** 80 **derived from RUES2 embryonic stem cells**

81 Methods are similar with the methods with cardiomyocytes-derived from iMR90 cells, please refer to  
82 session 2.2, 2.4, 2.5, and 2.8 in the main text for details.

83

84 **5. Gene expression assay on high purity cardiomyocytes**

85 Q-PCR assay was done in the same way as described in the “Quantitative RT-PCR” part of the main text.

86

87 **Supplemental Table 1. Primer sequences for Q-PCR assay.**

88 **Supplemental Table 2. Electrophysiological parameters for control and FA-treated IMR90-CMs**

89

90

91 **Results**

92 **1. Endotoxin assay on self-made palmitate-albumin complexes**

93 To ensure that endotoxin was not introduced during the process of making palmitate-albumin complexes,  
94 endotoxin assay was performed in HEK293 cells. As shown in Figure S1, there was no introduced  
95 endotoxin activity in the palmitate-albumin samples, compared to the medium only sample. The same  
96 experiment was performed for three different batches of palmitate-albumin complexes and similar  
97 endotoxin activity was observed.

98

99 **2. Live dead assay after fatty acids treatment**

100 Intracellular accumulation of long chain fatty acids in non-adipose tissues is associated with cellular  
101 dysfunction and cell death. The toxic effect is mainly mediated by saturated fatty acids, in this study,  
102 potentially by palmitate, which may induce apoptosis through both ceramide-dependent(Dyntar et al.,  
103 2001) and ceramide-independent(Listenberger et al., 2001) pathways. It has also been reported that  
104 palmitate induces cell death through generating reactive oxygen species(Listenberger et al., 2001).  
105 Reports also showed that co-administration of unsaturated fatty acids inhibits the pro-apoptotic effects of  
106 saturated fatty acids(Miller et al., 2005; Tumova et al., 2015). In this study, both saturated and  
107 unsaturated fatty acids were utilized at a physiological ratio and concentration that is present in the  
108 newborn serum. Careful observation was made after fatty acids supplement and no cell death was  
109 noticed. Live-dead assay was performed after two weeks of fatty acids treatment, similar cell numbers  
110 were obtained from the fatty acids treated and untreated groups, and no cell death was detected (Figure  
111 S2).

112

113 **3. Fatty acids uptake and cellular fatty acid content**

114 After two days of feeding, cells take up  $57 \pm 7 \mu\text{M}$  of fatty acids with carnitine added. Without adding  
115 carnitine, cells take up  $31 \pm 4 \mu\text{M}$  of fatty acids (Figure S3A). At the end of the two weeks FA treatment,  
116 intracellular fatty acid content was measured and normalized to protein concentration. FA content is  
117 significantly increased after FA treatment ( $6118 \pm 461 \text{ nmol NEFA/g protein}$  in control vs  $8933 \pm 488 \text{ nmol}$   
118  $\text{NEFA/g protein}$  in FA-treated,  $n = 3$ ,  $P < 0.05$ , Figure S3B).

119 **4. The effect of fatty acids treatment on cardiomyocytes-derived from RUES 2 cell line**

120 In the cardiomyocytes derived from human Rockefeller University Embryonic Stem Cell Line 2, fatty acids  
121 treatment induced cellular hypertrophy ( $1071 \pm 102 \mu\text{m}^2$  for control cells vs.  $1430 \pm 119 \mu\text{m}^2$  after fatty  
122 acids treatment,  $P < 0.05$ , Figure S4A). Also, fatty acids treatment leads to increased contractile force  
123 ( $15.31 \pm 1.29 \text{ nN/cell}$  for control cells,  $n=26$ , vs.  $22.33 \pm 2.33 \text{ nN/cell}$  after fatty acids treatment,  $n=28$ ,  
124  $P < 0.05$ , Figure S4B).

125 **5. The effect of cardiomyocyte purity on gene expression levels**

126 As mentioned in the methods session, runs that have over 80% cardiomyocyte purity were used in this  
127 study, to exclude the effect of ~20% non-cardiomyocytes, high purity cardiomyocytes (over 95%) were  
128 used to perform the same Q-PCR assay and similar results was observed (Figure S5).

129

130 **Supplemental References**

131 Coats, S.R., Berezow, A.B., To, T.T., Jain, S., Bainbridge, B.W., Banani, K.P., and Darveau, R.P. (2011).  
132 The lipid A phosphate position determines differential host Toll-like receptor 4 responses to  
133 phylogenetically related symbiotic and pathogenic bacteria. *Infection and immunity* 79, 203-210.  
134 Dyntar, D., Eppenberger-Eberhardt, M., Maedler, K., Pruschy, M., Eppenberger, H.M., Spinas, G.A., and  
135 Donath, M.Y. (2001). Glucose and palmitic acid induce degeneration of myofibrils and modulate  
136 apoptosis in rat adult cardiomyocytes. *Diabetes* 50, 2105-2113.  
137 Listenberger, L.L., Ory, D.S., and Schaffer, J.E. (2001). Palmitate-induced apoptosis can occur through a  
138 ceramide-independent pathway. *The Journal of biological chemistry* 276, 14890-14895.  
139 Miller, T.A., LeBrasseur, N.K., Cote, G.M., Trucillo, M.P., Pimentel, D.R., Ido, Y., Ruderman, N.B., and  
140 Sawyer, D.B. (2005). Oleate prevents palmitate-induced cytotoxic stress in cardiac myocytes.  
141 *Biochemical and biophysical research communications* 336, 309-315.  
142 Tumova, J., Malisova, L., Andel, M., and Trnka, J. (2015). Protective Effect of Unsaturated Fatty Acids on  
143 Palmitic Acid-Induced Toxicity in Skeletal Muscle Cells is not Mediated by PPARdelta Activation. *Lipids*  
144 50, 955-964.  
145 Wolf, A., Agnihotri, S., Micallef, J., Mukherjee, J., Sabha, N., Cairns, R., Hawkins, C., and Guha, A.  
146 (2011). Hexokinase 2 is a key mediator of aerobic glycolysis and promotes tumor growth in human  
147 glioblastoma multiforme. *The Journal of experimental medicine* 208, 313-326.  
148
