# Supplementary material for: Fatty Acids Enhance the Maturation of Cardiomyocytes Derived from Human Pluripotent Stem Cells
Source: PubMed Central journal article supplement — Stem Cell Reports. 2019 Sep 26;13(4):657–68. doi: 10.1016/j.stemcr.2019.08.013 (PMC6829750; doi:10.1016/j.stemcr.2019.08.013), 2019-09-26
Supplement: mmc2.pdf [file mmc2.pdf]

# Fatty Acids Enhance the Maturation of Cardiomyocytes Derived from Human Pluripotent Stem Cells

Xiulan Yang,<sup>1,6,7</sup> Marita L. Rodriguez,<sup>2,6,7</sup> Andrea Leonard,<sup>2,6,7</sup> Lihua Sun,<sup>1,6,7,11</sup> Karin A. Fischer,<sup>3,7</sup> Yuliang Wang,<sup>7,8</sup> Julia Ritterhoff,<sup>9,10</sup> Limei Zhao,<sup>1,6,7</sup> Stephen C. Kolwicz, Jr.,<sup>9,10</sup> Lil Pabon,<sup>1,6,7</sup> Hans Reinecke,<sup>1,6,7</sup> Nathan J. Sniadecki,<sup>2,6,7</sup> Rong Tian,<sup>9,10</sup> Hannele Ruohola-Baker,<sup>3,7</sup> Haodong Xu,<sup>1,6,7</sup> and Charles E. Murry<sup>1,4,5,6,7,\*</sup>

<sup>1</sup>Department of Pathology, University of Washington, Seattle, WA 98109, USA

<sup>2</sup>Department of Mechanical Engineering, University of Washington, Seattle, WA 98109, USA

<sup>3</sup>Department of Biochemistry, University of Washington, Seattle, WA 98109, USA

<sup>4</sup>Department of Bioengineering, University of Washington, Seattle, WA 98109, USA

<sup>5</sup>Department of Medicine/Cardiology, University of Washington, Seattle, WA 98109, USA

<sup>6</sup>Center for Cardiovascular Biology, University of Washington, Seattle, WA 98109, USA

<sup>7</sup>Institute for Stem Cell and Regenerative Medicine, University of Washington, 850 Republican Street, Brotman Building Room 453, Seattle, WA 98109, USA

<sup>8</sup>Paul G. Allen School of Computer Science and Engineering, University of Washington, Seattle, WA 98109, USA

<sup>9</sup>Mitochondria and Metabolism Center, University of Washington, Seattle, WA 98109, USA

<sup>10</sup>Department of Anesthesiology and Pain Medicine, University of Washington, Seattle, WA 98109, USA

<sup>11</sup>Department of Pharmacology (State-Province Key Laboratories of Biomedicine-Pharmaceutics of China, Key Laboratory of Cardiovascular Medicine Research, Ministry of Education), College of Pharmacy, Harbin Medical University, Harbin, Heilongjiang 150081, P. R. China

\*Correspondence: [murry@uw.edu](mailto:murry@uw.edu)

<https://doi.org/10.1016/j.stemcr.2019.08.013>

## SUMMARY

Although human pluripotent stem cell-derived cardiomyocytes (hPSC-CMs) have emerged as a novel platform for heart regeneration, disease modeling, and drug screening, their immaturity significantly hinders their application. A hallmark of postnatal cardiomyocyte maturation is the metabolic substrate switch from glucose to fatty acids. We hypothesized that fatty acid supplementation would enhance hPSC-CM maturation. Fatty acid treatment induces cardiomyocyte hypertrophy and significantly increases cardiomyocyte force production. The improvement in force generation is accompanied by enhanced calcium transient peak height and kinetics, and by increased action potential upstroke velocity and membrane capacitance. Fatty acids also enhance mitochondrial respiratory reserve capacity. RNA sequencing showed that fatty acid treatment upregulates genes involved in fatty acid  $\beta$ -oxidation and downregulates genes in lipid synthesis. Signal pathway analyses reveal that fatty acid treatment results in phosphorylation and activation of multiple intracellular kinases. Thus, fatty acids increase human cardiomyocyte hypertrophy, force generation, calcium dynamics, action potential upstroke velocity, and oxidative capacity. This enhanced maturation should facilitate hPSC-CM usage for cell therapy, disease modeling, and drug/toxicity screens.

## INTRODUCTION

Promoting the maturation of the cardiomyocytes derived from human pluripotent stem cells (hPSC-CMs) has become the subject of intense research to better achieve their potential applications in heart regeneration, disease modeling, and drug screening/discovery (Yang et al., 2014a). A number of approaches have been applied to promote hPSC-CM maturation including long-term culture (Lundy et al., 2013; Sartiani et al., 2007), metabolic hormonal treatment (Birket et al., 2015; Kosmidis et al., 2015; Parikh et al., 2017; Ribeiro et al., 2015; Yang et al., 2014b), substrate stiffness (Feaster et al., 2015; Hazeltine et al., 2012), microRNAs (Kuppasamy et al., 2015; Lee et al., 2015), or tissue engineering (Nunes et al., 2013; Ronaldson-Bouchard et al., 2018; Ruan et al., 2015; Tulloch et al., 2011). These approaches have promoted some maturation in morphology, molecular, and/or functional aspects, but there is considerable room for improvement.

The role of metabolism in promoting maturation of hPSC-CMs has not been widely explored. Immediately after birth there is a major change in metabolism as the infant switches from placental nutrition to nursing. Correspondingly, while fetal cardiomyocytes mostly rely on glycolysis for ATP production, cardiomyocytes of newborns adapt to obtain their ATP predominantly through fatty acid  $\beta$ -oxidation (Makinde et al., 1998). Standard cell culture media principally offer glucose as a cellular energy source, and significant lipids are rarely present. For instance, in the commonly used RPMI plus B27 plus insulin (RPMI-B27-insulin) medium for hPSC-CM culture, there is  $<10 \mu\text{M}$  total lipids (which includes  $3.5 \mu\text{M}$  oleic acid,  $3.5 \mu\text{M}$  linolenic acid, and  $0.2 \mu\text{M}$  lipoic acid [Brewer and Cotman, 1989]), whereas in human infants the serum fatty acid concentration is  $\sim 300 \mu\text{M}$  (Makinde et al., 1998). In addition, polyunsaturated fatty acids (PUFAs) are important not only as energy substrates but also as ligands for some intracellular signaling pathways. Thus, the shortage

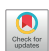

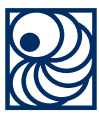

of fatty acids might limit cellular functions important for maturation.

Biochemical assays demonstrate that cultured fetal and neonatal rat cardiomyocytes contain lower fatty acid contents (saturated, monounsaturated, and polyunsaturated) than native myocardium at comparable developmental stages (Karimata et al., 2013). In addition, cardiomyocytes from pythons and neonatal rats undergo hypertrophy in response to fatty acid treatments (Riquelme et al., 2011). This suggested to us that providing fatty acids to hPSC-CMs may promote a more physiological postnatal state and enhance hPSC-CM developmental maturation. In this study, we show that supplementing the culture medium with the three most abundant fatty acids in the newborn serum (palmitic, oleic, and linoleic acids) at physiological concentrations promotes hPSC-CM maturation.

## RESULTS

### hPSC-CM Take Up Fatty Acids in a Carnitine-Dependent Manner

The total concentration of fatty acids in human newborn infants was estimated at  $\sim 300 \mu\text{M}$  (Makinde et al., 1998). Among them, palmitic acid occupies  $\sim 34\%$  of total fatty acids, with  $\sim 27\%$  for oleic acid and  $\sim 15\%$  for linoleic acid. Therefore, in this study, to mimic the *in vivo* developmental fatty acid concentrations and components, we treated the hPSC-CMs with  $105 \mu\text{M}$  palmitate-albumin,  $81 \mu\text{M}$  oleic acid-albumin, and  $45 \mu\text{M}$  linoleic acid-albumin complexes. These fatty acids were supplemented with  $250 \mu\text{M}$  carnitine in RPMI-B27-insulin medium. We validated that the palmitate-albumin complex is endotoxin free and that there was no lipid toxicity by fatty acid treatment (Figures S1 and S2).

We assessed whether the hPSC-CMs are capable of taking up some of the provided fatty acids by quantifying the nonesterified fatty acids in the medium before and after 2 days of treatment in cardiomyocytes derived from IMR90 human induced IPCs (hiPSCs). We found that one million cells take up  $57 \pm 7 \mu\text{M}$  of the provided  $\sim 231 \mu\text{M}$  fatty acids after two days of feeding, indicating a substantial capacity for metabolism. Similar fatty acid uptake amounts were found with cardiomyocytes derived from RUES2 human embryonic stem cells and WTC hiPSCs, suggesting that the capacity for fatty acid metabolism is a general property of hPSC-CMs. We wondered whether prolonged fatty acid feeding would enhance fatty acid uptake from the medium, but after 2 weeks of feeding, the rate of fatty acid uptake was unchanged. Since hPSC-CMs only take up about one-third of the provided fatty acids per feeding, we decided to use half ( $\sim 115.5 \mu\text{M}$ ) of the original calculated fatty acid concentration in the

remainder of this study. Removing carnitine reduced fatty acid uptake by nearly 50%,  $31 \pm 4 \mu\text{M}$  versus  $57 \pm 7 \mu\text{M}$  (Figure S3A), indicating this amino acid is vital to fatty acid metabolism in hPSC-CMs. Next, we measured the impact of fatty acid feeding on free fatty acid content in hPSC-CMs. At the end of the 2 weeks of fatty acid treatment, intracellular fatty acid content was increased by 46% ( $6,118 \pm 461 \text{ nmol nonesterified fatty acid [NEFA]/g protein}$  in control versus  $8,933 \pm 488 \text{ nmol NEFA/g protein}$  in fatty acid-treated hPSC-CMs,  $n = 3$  biological replicates,  $p < 0.05$ , Figure S3B).

### Fatty Acid Supplementation Enhances Structural Maturation

To characterize the effects of fatty acids on morphology and gene expression of hPSC-CMs, we stained cells for F-actin with phalloidin and for  $\alpha$ -actinin (a Z-disk protein) with an antibody. Control cells were small and round-to-polygonal in shape. Fatty acid treatment for 2 weeks increased cell area by 59% ( $1,326 \pm 63 \mu\text{m}^2$  versus  $2,104 \pm 105 \mu\text{m}^2$ ,  $p < 0.001$ ) and modestly decreased circularity index ( $0.63 \pm 0.01$  versus  $0.58 \pm 0.01$ ,  $p < 0.001$ ). This corresponds to a more mature cardiomyocyte phenotype with bigger cells and anisotropy (Figures 1A–1D). Sarcomere length increased significantly from  $1.73 \pm 0.02 \mu\text{m}$  in control hPSC-CMs to  $1.80 \pm 0.02 \mu\text{m}$  after fatty acid treatment ( $p < 0.005$ ) (Figure 1E). In addition to the cardiomyocytes derived from IMR90 hiPSCs, fatty acids also significantly increased the size of cardiomyocytes derived from RUES2 embryonic stem cells, indicating that this is a general property of hPSC-CMs (Figure S4A).

### Fatty Acid Supplementation Enhances Calcium Transient Kinetics

To investigate potential effects of fatty acids on calcium transient kinetics, we used the intracellular ratiometric calcium dye Fura-2 AM and compared control versus fatty acid-treated hPSC-CMs under 1-Hz electrical stimulation. Representative traces are shown in Figure 2A. Fatty acid treatment leads to significant increase in calcium peak transient amplitude ( $0.16 \pm 0.01$  versus  $0.24 \pm 0.02 F/F_0$ ,  $p < 0.005$ , Figure 2B). Also, the maximal upstroke and decay velocities were significantly higher in fatty acid-treated hPSC-CMs. Specifically,  $V_{\text{max}}$  upstroke was faster ( $2.91 \pm 0.39$  versus  $5.21 \pm 0.65 F/F_0/s$ ,  $p < 0.005$ , Figure 2C) as well as the calcium transient decay velocity ( $0.80 \pm 0.05$  versus  $1.13 \pm 0.09 F/F_0/s$ ,  $p < 0.005$ , Figure 2D).

### Fatty Acids Improve Contractile Force

There are significant differences in contractile force between immature and mature cardiomyocytes (Yang et al., 2014a). We used our previously reported elastomeric micropost system (Rodriguez et al., 2014; Yang et al., 2014b)

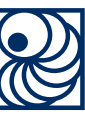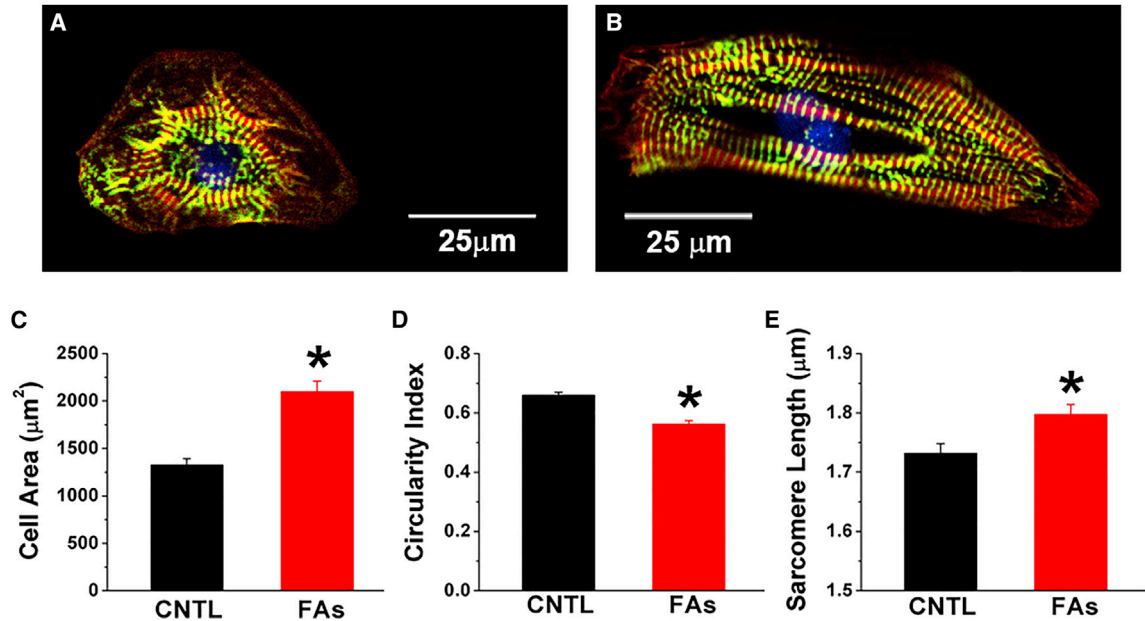

### Figure 1. Fatty Acid Treatment Leads to hPSC-CM Morphological and Molecular Changes

Representative control (A) and fatty acid-treated (B) cells were stained with  $\alpha$ -actinin antibody (green), phalloidin (F-actin in red), and Hoechst 33342 for nuclei (blue). Scale bar, 25  $\mu\text{m}$ . Compared with control hPSC-CMs, fatty acid-treated cells exhibited significant changes in cell area (C), circularity index (D), and sarcomere length (E).  $n > 150$  from three different cardiomyocyte differentiation runs. Data are presented as mean  $\pm$  SEM. \* $p < 0.05$ . See also Figure S4.

to assess the contractile force of individual control or fatty acid-treated hPSC-CMs. Figure 3A shows representative traces of the total force generated by individual cardiomyocytes. Control cells exhibited a twitch force of  $10.1 \pm 0.5$  nN/cell. Fatty acid-treated cells showed a significantly higher twitch force of  $13.4 \pm 0.8$  nN/cell ( $p < 0.0001$ ) as shown in Figure 3B ( $n = 91$  for control hPSC-CMs and  $n = 91$  for fatty acid-treated hPSC-CMs). It is also worth noting that cardiomyocyte sizes were significantly increased after fatty acid treatment on the microposts ( $202.6 \pm 4.1 \mu\text{m}^2$  for control cells versus  $238.8 \pm 6.6 \mu\text{m}^2$  after treatment,  $p < 0.0001$ ), as shown in Figure 3C. The contractile force assay was performed in cardiomyocytes derived from RUES2 embryonic stem cells, and similar results were acquired (Figure S4B).

### Fatty Acids Improve Action Potential Upstroke Velocity and Increase Membrane Capacitance

Immature cardiomyocytes display slower action potential upstroke velocity than their adult counterparts. To investigate whether fatty acid treatment improves electrophysiological maturation, we performed whole-cell patch clamping to record the cardiomyocyte spontaneous action potentials. Fatty acids increase action potential maximum upstroke velocity,  $dV/dt_{\text{max}}$ , by 57% ( $23.5 \pm 1.8$  V/s in control [ $n = 24$ ] versus  $37.0 \pm 5.7$  V/s after treatment [ $n = 25$ ],  $p = 0.03$ , Figure 4A). Furthermore, fatty acid treatment

increases membrane capacitance by 24%, indicating that cell surface area is significantly increased ( $59.6 \pm 4.7$  pF in control [ $n = 14$ ] versus  $73.7 \pm 4.6$  pF [ $n = 15$ ] after fatty acid treatment,  $p = 0.04$ , Figure 4B). Fatty acid treatment does not affect spontaneous beating rate, maximal diastolic potential, action potential amplitude, action potential duration at 50% repolarization, and action potential duration at 90% repolarization (Table S2).

### Effect of Fatty Acids on Mitochondrial Respiratory Reserve Capacity

The Seahorse XF 96 extracellular flux analyzer was used to characterize mitochondrial function as previously reported (Yang et al., 2014b). In this assay, the mitochondrial respiratory reserve capacity can be determined by the difference between the normalized oxygen consumption rate (OCR) value before and after the protonophore uncoupler, FCCP (carbonyl cyanide-*p*-trifluoromethoxyphenylhydrazone), using glucose as the metabolic substrate. Figure 5A shows representative traces with or without fatty acid treatment, and Figure 5B shows the statistical difference between groups. Due to variations in the absolute magnitude of OCR measurements in different experimental runs, we report the ratio of fatty acid-treated/untreated OCRs for statistical analysis ( $n = 6$ ). The maximal mitochondrial respiratory capacity after the FCCP treatment was enhanced by  $\sim 38\%$  after fatty acid treatment.

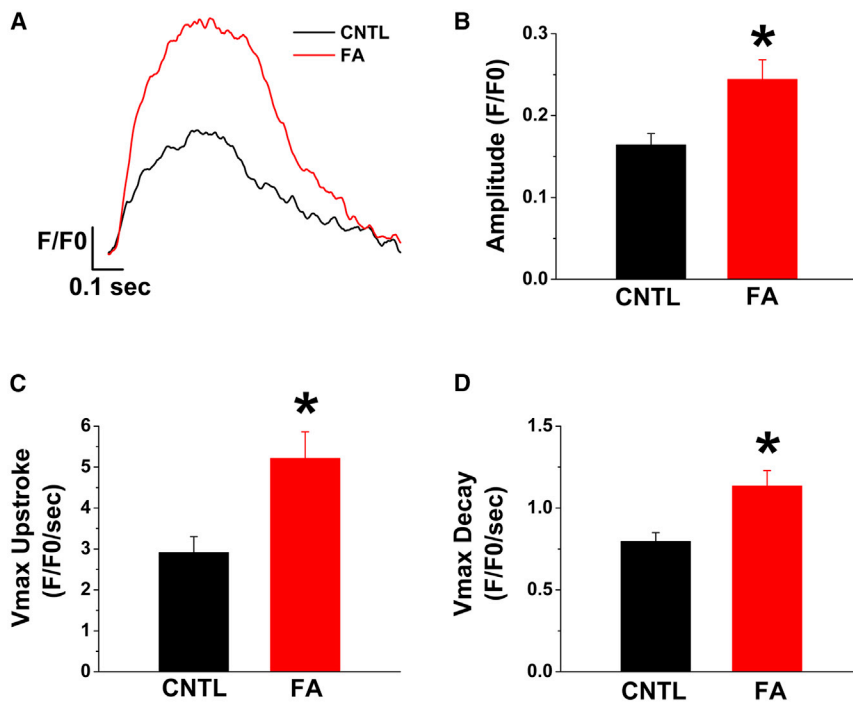

### Figure 2. Fatty Acid-Treated hPSC-CMs Exhibit Improved Calcium Transient Kinetics

Calcium transients were evaluated by loading the hPSC-CMs with the intracellular calcium ratiometric indicator Fura-2 AM and were stimulated at 1 Hz.

(A) Representative transients from control and fatty acid-treated hPSC-CMs. Note the higher amplitude, faster upstroke, and decay of the  $\text{Ca}^{2+}$  transient in the treated cells.

(B–D) Calcium transient amplitude magnitudes were significantly higher in fatty acid-treated hPSC-CM (B), as indicated by increases in maximal upstroke (C) and decay (D) velocities.  $n = 10\text{--}16$  cells from three separate cardiomyocyte differentiation runs. Data are presented as mean  $\pm$  SEM.  $F/F_0$  is the ratio of  $F_{340}/F_{380}$ . \* $p < 0.05$  versus control hPSC-CMs.

### Fatty Acids Activate Genes Involved in $\beta$ -Oxidation and Suppress Genes Involved in Lipid Synthesis

To determine the genome-wide effects of fatty acid treatment, we sequenced RNA from control and fatty acid-treated cardiomyocytes. We found 61 differentially expressed genes, as shown in the volcano plot in Figure 6A. Not surprisingly, gene ontology (GO) enrichment analysis showed that the most significant GO terms are all related to fatty acid/lipid metabolism. The upregulated genes are enriched for fatty acid and lipid oxidation (Figure 6B); the downregulated genes are enriched in lipid biosynthesis (Figure 6C). For example, stearoyl-coenzyme A (CoA) desaturase (*SCD*) and fatty acid desaturase 2 (*FADS2*) are downregulated after fatty acid treatment. Sterol regulatory element binding transcription factor 1 (*SREBF1*; also known as *SREBP1*) is a transcriptional activator of fatty acid and cholesterol synthesis. Its expression is also significantly suppressed, suggesting that cells are shutting down *de novo* synthesis when external fatty acid is abundant. On the other hand, the genes involved in fatty acid oxidation are significantly upregulated, such as *CD36*, also known as fatty acid translocase, which transfers fatty acids from extracellular space into the cytosol. Also upregulated is carnitine palmitoyltransferase 1A (*CPT-1A*), which transports long-chain fatty acyl-CoAs from the cytoplasm into the mitochondria and is the rate-controlling enzyme of the long-chain fatty acid  $\beta$ -oxidation pathway. The expression of *SLC25A20*, another cytosolic-mitochondrial fatty acid transporter, is also enhanced. Other genes involved

in fatty acid  $\beta$ -oxidation (acyl-CoA dehydrogenase very long chain [*ACADVL*], enoyl-CoA hydratase 1 [*ECH1*], and acetyl-CoA acyltransferase 2 [*ACAA2*]) are also significantly upregulated after fatty acid feeding. The expression of pyruvate dehydrogenase kinase 4 (*PDK4*), which inhibits glucose and lactate metabolism, was upregulated. Electron-transfer flavoprotein dehydrogenase (*ETFHDH*), a component of the mitochondria electron transport chain, has higher expression level in fatty acid-treated samples. Some of the aforementioned gene-expression changes were verified by performing traditional qPCR (Figure 6D). The increase in transcripts for fatty acid metabolism was accompanied by a decrease in transcripts for glucose metabolism, such as glucose transporter 4 (*SLC2A4*) and hexokinase 2 (*HK2*; Figure 6D). Because some of the cardiac differentiation runs had up to 20% noncardiomyocytes, we repeated these qPCR experiments with high-purity cardiomyocytes (over 95% positive cardiac troponin T). Similar results were observed, indicating that these gene-expression changes reflected cardiomyocytes and not the nonmyocytes (Figure S5).

### Fatty Acids Activate Multiple Intracellular Signaling Pathways

There are reports that free fatty acids (FFAs) acutely stimulate protein phosphorylation in immortalized cell lines, suggesting a diverse role in signal transduction (Sanchez-Reyes et al., 2014; Watt et al., 2006). Indeed, some G-protein-coupled receptors have been identified as FFA

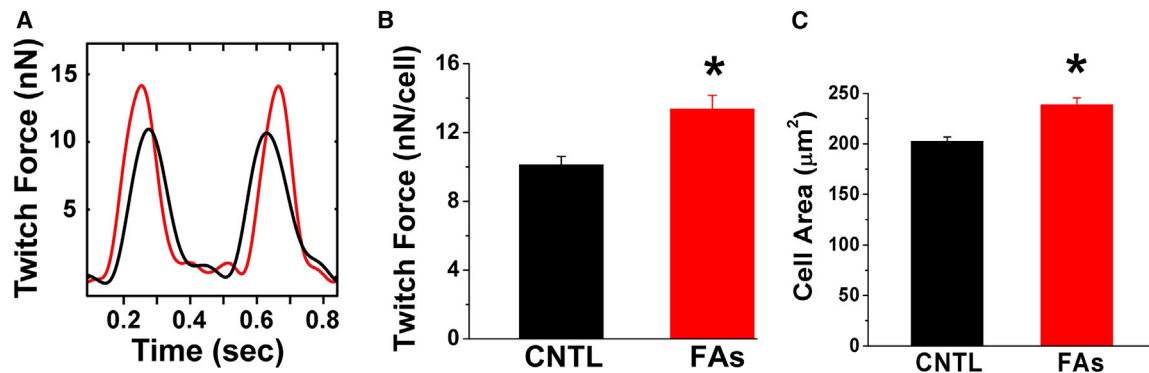

**Figure 3. Fatty Acid Treatment Significantly Increases hPSC-CM Contractile Force**

(A–C) Representative force traces generated by control and fatty acid-treated hPSC-CMs (A). The statistical analysis results are shown in (B). Control and fatty acid-treated cardiomyocyte area on microposts is shown in (C).  $n = 91$  for control hPSC-CMs and  $n = 91$  for fatty acid-treated hPSC-CMs from four different cardiomyocyte differentiation runs. Data are presented as mean  $\pm$  SEM. \* $p < 0.05$  versus control hPSC-CMs. See also [Figure S4](#).

receptors (Watson et al., 2012). To investigate possible signal pathways involved in fatty acid treatment of hPSC-CMs, we assessed multiple phosphokinases. AMP-activated protein kinase (AMPK) is activated by phosphorylation of Thr<sup>172</sup> within the  $\alpha$  subunit by LKB1. AMPK is described as a cellular “energy sensor” because its activity is increased when AMP levels are elevated, resulting in increased catabolism and ATP regeneration. Fifteen minutes and 30 min after fatty acid treatment, we found that AMPK Thr<sup>172</sup> phosphorylation is upregulated markedly, which would be expected to lead to a feedforward activation of fatty acid oxidation pathway (Figure 7). Acetyl-CoA carboxylase (ACC) was phosphorylated by AMPK and then facilitated fatty acid transport into mitochondria, thus inhibiting fatty acid biosynthesis. After fatty acid treatment, the phospho-ACC level also was upregulated. In contrast, the level of phospho-Akt (Ser<sup>473</sup>; part of the insulin response pathway) was decreased by fatty acid treatment. We also found that phospho-ERK and phospho-p38 MAPK levels were upregulated by acute FFA treatment (Figure 7).

## DISCUSSION

Human PSC-CMs provide an attractive cell source for heart regeneration, disease modeling, drug screening, and toxicity testing. A significant limitation of these hPSC-CMs is that they exhibit immature properties (Yang et al., 2014a), which limits their utility in disease modeling and therapeutic applications. Although some progress has been made to obtain more mature hPSC-CMs, there is much room for improvement. Because of the marked postnatal changes in cardiac metabolism (Makinde et al., 1998), we hypothesized that altering metabolic substrate to fatty acids would drive maturation.

Riquelme et al. (2011) showed that fatty acids stimulate the postprandial growth of the python heart, and that adding three of the constituent fatty acids (myristate C14:0, palmitate C16:0, and palmitoleate C16:1) was sufficient to induce hypertrophy in cultured neonatal rat cardiomyocytes. In pilot studies, we verified that these fatty acids caused the expected changes in gene expression in neonatal rat cardiomyocytes, including increased *MYH6*, and decreased *MYH7* and *NPPA* (data not shown). However, treating the hPSC-CMs with this fatty acid cocktail does not lead to the same gene-expression changes. We then hypothesized that human cardiomyocytes would be fatty acid responsive, but they require a different cocktail than either pythons or rats. We therefore designed a cocktail based on breastfed human infant serum (Hardell and Walldius, 1980) and breast milk (Gibson and Kneebone, 1981), and found that palmitate, oleate, and linoleate could induce hPSC-CM hypertrophy. The specificity of the fatty acids suggests a role beyond metabolic flux in mediating hypertrophic growth, supported by our observations that these molecules activate multiple signaling pathways (Figure 7).

Although fatty acid treatment clearly promoted hypertrophic growth and increased myofibril content (Figure 1), we were surprised that this was not accompanied by an increase in mRNA transcripts for myofibril genes. It is possible that post-transcriptional pathways such as translation efficiency or protein stability account for this. Conversely, since our RNA-sequencing experiments were normalized to total transcript abundance (FPKM [fragments per kilobase per million reads mapped]), it is possible that a “more of everything per cell” state would not be detected by this approach.

In contrast, RNA sequencing showed that fatty acid treatment upregulates genes involved in fatty acid  $\beta$ -oxidation and downregulates genes in lipid synthesis and glucose

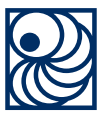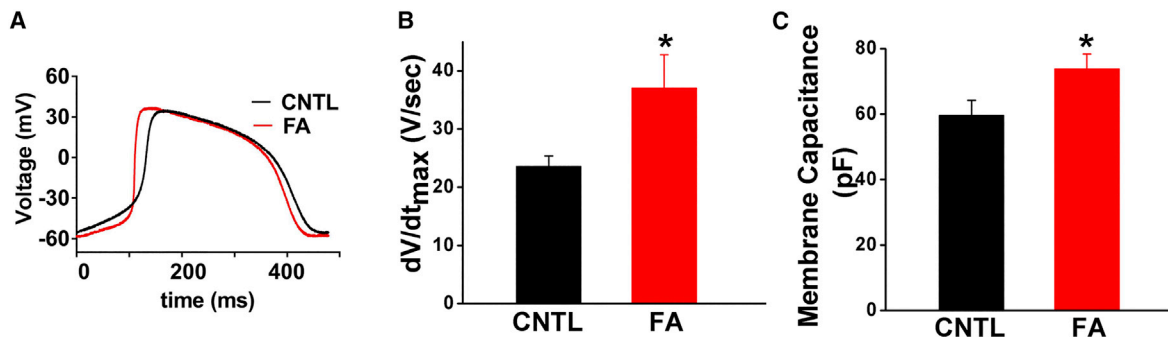

**Figure 4. Fatty Acid Treatment Improves Cardiomyocyte Action Potential Maximum Upstroke Velocity and Increases Cardiomyocyte Membrane Capacitance**

(A) Representative action potential traces from control and fatty acid-treated cells.

(B) Statistical analysis of action potential maximum upstroke velocity.

(C) Analysis of cardiomyocyte membrane capacitance.

Data were obtained from three different cardiomyocyte differentiation runs.  $n = 24$  for control group and  $n = 25$  for fatty acid-treated group. \* $p < 0.05$  versus control hPSC-CMs. Data are presented as mean  $\pm$  SEM. See also [Table S2](#).

metabolism—specifically, the mRNA level of *CD36*, *CPT-1B*, and *PDK4*, which likely enhance the capacity to oxidize fatty acids. Concomitantly, the mRNAs encoding proteins involved in glucose handling (*SLC2A4* and *HK2*) are down-regulated, in agreement with the Randle cycle (Hue and Taegtmeier, 2009), in which fatty acid oxidation inhibits glucose utilization. As far as the mechanism is concerned, evidence is accumulating for the existence of fatty acid-mediated transcriptional regulation of various genes involved in lipid metabolism. In a number of cases the responsive *cis*-regulatory element has been identified as a peroxisome proliferator responsive element, which binds peroxisome proliferator activated receptors (PPARs), members of the nuclear hormone receptor family. Studies have provided strong evidence that long-chain fatty acids act as natural ligands for PPARs (Amri et al., 1995; Kliewer et al., 1997). Indeed, the aforementioned *FAT/CD36* and *CPT-1B* are PPAR responsive.

In addition to long-term changes in gene expression, fatty acids have short-term physiological effects on the heart. In Langendorff-perfused rat hearts, low doses of fatty acids (sodium palmitate at 0.12 mM) increased ventricular developed pressure and lowered heart rate and glucose uptake, while high doses of fatty acids (sodium palmitate from 0.3 to 1.5 mM) decreased pressure development (Guarner et al., 2002). Taken together with our single-cell contractility data, these findings indicate that fatty acids can augment cardiac contractile function. Our data add to these observations by demonstrating that enhanced calcium dynamics likely underlie at least part of this boost in contractility (Figure 4).

We observed a significant set of protein phosphorylation events after fatty acid feeding. Fatty acids acutely activate the AMPK pathway, which successively leads to ACC

phosphorylation and the promotion of fatty acid oxidation. Interestingly, fatty acids also lead to ERK and p38-MAPK phosphorylation, suggesting that fatty acids not only serve as cellular energy sources but also ligands to activate their own downstream signal pathways. A previous report (Miller et al., 2005) indicated that treating neonatal rat cardiomyocytes with lipotoxic levels of palmitate (0.5 mM) for 18 h increased phosphorylation of ERK and p38. This phosphorylation was implicated in the cytotoxicity of palmitate, since cotreatment of the cells with 0.1 mM oleate prevented palmitate-induced ERK and p38 activation. Since no lipid cytotoxicity was observed in this study, we hypothesize that ERK and p38 transient activation by fatty acid treatment leads to signal cascades that promote hPSC-CM growth and hypertrophy (Maillet et al., 2013).

The effect of fatty acid feeding appears to be robust, in that we observed similar maturation effects in cardiomyocytes derived from three different hPSC lines. IMR90 cardiomyocytes were the major line used for all of the endpoints. Cardiomyocytes derived from an embryonic stem cell line, RUES2, were used to test the major findings of this study including the amount of fatty acids taken up by the cells, cellular hypertrophy, and contractile force after fatty acid exposure. We also investigated fatty acid uptake by cardiomyocytes derived from another iPSC line, WTC-11. After 2 days of feeding, one million WTC-11-derived cardiomyocytes take up  $50 \pm 7 \mu\text{M}$  fatty acid. Thus, fatty acids regulate cardiac maturation in both human iPSC- and embryonic stem cell-derived cardiomyocytes.

During the revision process of this article, three other reports (Correia et al., 2017; Hu et al., 2018; Mills et al., 2017) were published in which fatty acids were found to promote hPSC-CM maturation. Mills et al. (2017) used engineered heart tissues in a 96-well device for medium-throughput

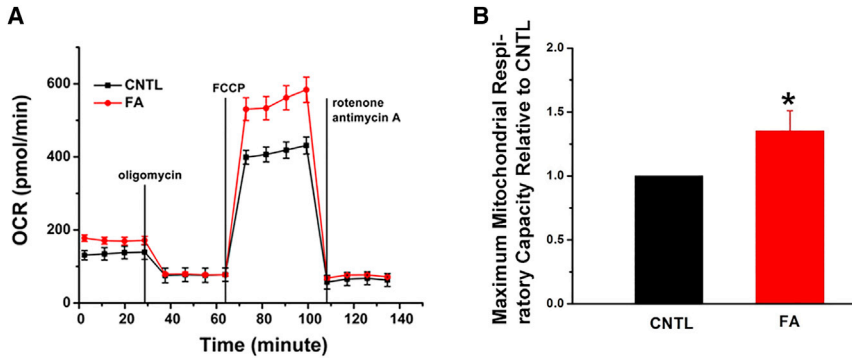

**Figure 5. The Effect of Fatty Acids on Mitochondrial Function**

(A) Representative traces for control and fatty acid-treated hPSC-CMs responding to the ATP synthase inhibitor oligomycin, the respiratory uncoupler FCCP, and the respiratory chain blockers rotenone and antimycin A. Note the higher maximal OCR in the fatty acid-treated cells.

(B) Statistical analysis of the differences in respiratory reserve capacity. The OCR values were normalized to the number of cells present in each well, as described in [Experimental Procedures](#).

Data were from six different cardiomyocyte differentiation runs. \* $p < 0.05$  versus control hPSC-CMs. Data are presented as mean  $\pm$  SEM.

screening of factors (including extracellular matrix, metabolic substrate, and growth factor conditions) that promote functional maturation. The screen revealed that a switch to fatty acid metabolism is a central driver for cardiac maturation, including increasing hypertrophy, contractility, and reducing cell-cycle activity. [Correia et al. \(2017\)](#) reported that shifting medium from glucose-containing to glucose-free, with the addition of galactose and fatty acid (oleate + palmitate), promotes hPSC-CM maturation, resulting in cardiomyocytes with higher oxidative metabolism, transcriptional signatures closer to those of adult tissue, improved calcium handling, and enhanced contractility. These authors did not indicate that their fatty acids were loaded onto albumin, and this may explain why lipotoxicity was observed in their experiments. Most recently, [Hu et al. \(2018\)](#) cultured cells in medium containing 100  $\mu$ M oleate and 50  $\mu$ M palmitate with or without glucose and found no functional benefits when culturing cells in the medium containing fatty acids in the presence of high glucose for 1 week, while in glucose-free medium containing fatty acids, hPSC-CM exhibited greater force, and enhanced calcium dynamics and greater mitochondrial respiration rates. In this study, the fatty acids were not bound with albumin. Our current study reinforces these findings and is unique in that we used a developmentally related, albumin-bound, fatty acids cocktail at a physiological stoichiometry, whereby we identified that increased calcium dynamics underlie increases in contractility, demonstrated the need for carnitine to promote maximal cellular fatty acid uptake, and showed increased fatty acid content in hPSC-CMs. In addition, we investigated the signal pathways that are involved after the cells exposed to fatty acids (including AMPK, ERK, and p38 MAPK). Taken together, these studies provide strong evidence that the metabolic switch from glucose to fatty acids is a driver of hPSC-CM maturation.

Although treating hPSC-CMs with physiologically and developmentally relevant concentrations of long-chain fatty acids leads to a more mature morphological and functional hPSC-CM phenotype, these cells are still immature compared with adult cardiomyocytes ([Yang et al., 2014a](#)). Since developing cardiac cells *in vivo* are exposed to the combined effects of diverse cues including mechanical signals, extracellular matrix, soluble factors, substrate stiffness, and electrical fields, it seems likely that a combinatorial approach will lead to better hPSC-CM maturation.

## EXPERIMENTAL PROCEDURES

### Making Palmitate-Albumin Complexes

Palmitate-BSA stock was prepared at a final concentration of 4 mM palmitate with 12% fatty acid-free BSA (molar ratio 2.2:1) (both purchased from Sigma-Aldrich) in glucose/pyruvate-free Krebs-Henseleit buffer (KHB) with modifications as described previously ([Bakrania et al., 2016](#)). In brief, palmitate was dissolved in 38% ethanol in 0.5 mM  $\text{Na}_2\text{CO}_3$  at 60°C under constant nitrogen gas. Upon dissolving, ethanol was boiled off by increasing the temperature to 80°C–90°C. BSA was dissolved in KHB at 37°C. BSA solution and palmitate solution were mixed together under constant stirring at 37°C. Successful complexing of palmitate to BSA was monitored when no clouding of the solution occurred. The BSA-palmitate solution was stirred for an additional 5 min before being dialyzed overnight and sterile filtered using 0.45- $\mu$ m pore size membrane filter. Aliquots were stored at –20°C. Oleic acid-albumin and linoleic acid-albumin complexes were purchased from Sigma.

### Cell Culture

Undifferentiated human IMR90-induced pluripotent stem cells, originally derived from lung fibroblasts ([Yu et al., 2007](#)) (James A. Thomson, University of Wisconsin-Madison), were expanded using mouse embryonic fibroblast-conditioned medium supplemented with 5 ng/mL basic fibroblast growth factor. Cardiomyocytes were obtained using a protocol based on our previously

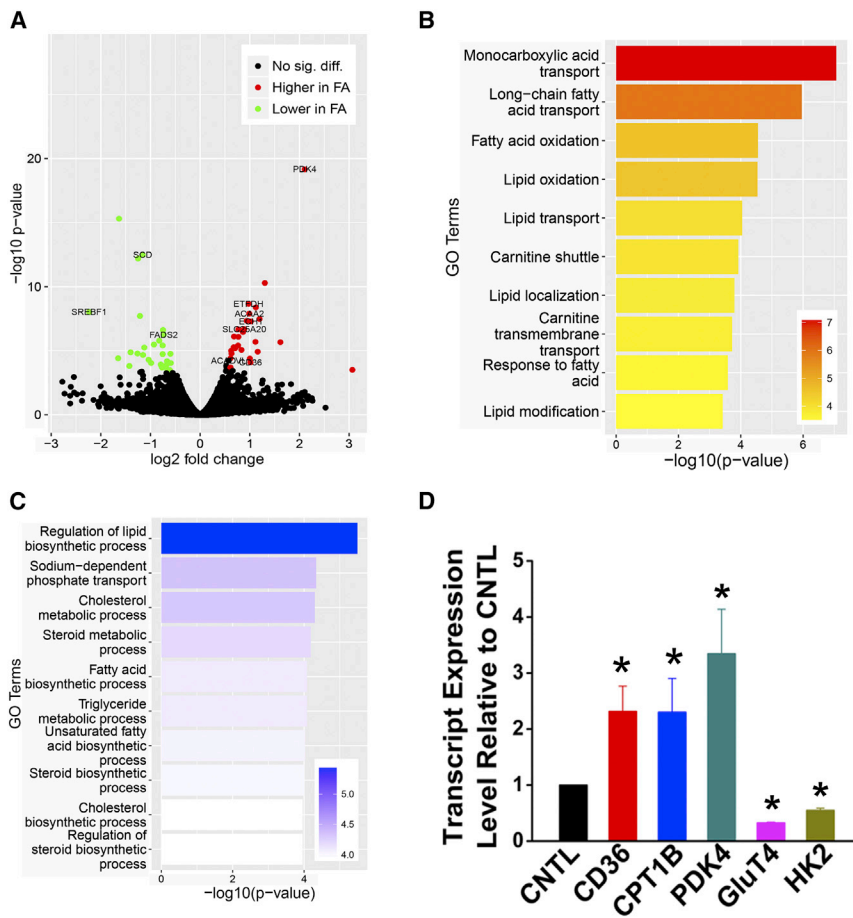

**Figure 6. Genome-wide Effects of Fatty Acid Treatment Assessed by RNA Sequencing**

(A) Volcano plot shows the differential expressed genes after fatty acid treatment.

(B and C) Gene ontology (GO) enrichment analysis illustrating the upregulated and downregulated pathways after fatty acid treatment.

(D) qPCR verified some of the candidate genes in RNA sequencing that involved fatty acid transportation, and also the genes involved in glucose metabolism. \**p* < 0.05 versus control hPSC-CMs.

See also [Table S1](#).

reported directed differentiation method that involves the serial application of activin A and bone morphogenetic protein 4 (BMP4) under serum-free, monolayer culture conditions (Hofstee et al., 2016). The cultures were also supplemented with the Wnt agonist CHIR 99021 in the early stages of differentiation followed by the Wnt antagonist Xav 939. After 20 days of *in vitro* differentiation, the cells were dispersed using 0.025% trypsin-EDTA and replated. Cultures were fed every other day thereafter with serum-free RPMI-B27 plus L-glutamine. Only cell preparations containing >80% cardiac troponin T-positive cardiomyocytes were used for the current study. After 20 days of differentiation, the cells were treated with half dosage (52.5  $\mu$ M palmitate-BSA, 40.5  $\mu$ M oleate-BSA, and 22.5  $\mu$ M linoleate-BSA) of fatty acid-albumin complexes in RPMI-B27-insulin medium for 2 weeks. Note that glucose was maintained at its normal media levels (11 mM). L-Carnitine was added to the medium at 120  $\mu$ M, because this dipeptide is essential for fatty acid transport into mitochondria. Control hPSC-CMs were fed with the same basal medium (RPMI-B27-insulin) supplemented with 50  $\mu$ M fatty acid-free albumin and 120  $\mu$ M carnitine. Media were changed every other day. This study was mainly performed with cardiomyocytes derived from the IMR90 hiPSC line. However, cardiomyocytes from another hiPSC cell line, WTC-11 (Miyaoaka et al., 2014) (Wild Type C, Gladstone Institute of Cardiovascular Disease, University of California

San Francisco), and an embryonic stem cell line, RUES2 (Rockefeller University, New York, NY), were also used to confirm that major findings were generally applicable. RUES2 and WTC-11 undifferentiated cells were cultured with mTeSR medium and differentiation protocols similar to those for IMR90 were used to obtain cardiomyocytes from these two cell lines. Only cell preparations containing >80% cardiac troponin T-positive cardiomyocytes (by flow cytometry) were used for the current investigation.

### Fatty Acid Concentration Measurements

Fatty acid concentration in the medium before and 48 h after treating the cells was determined using the HR Series NEFA-HR (Kanno et al., 2004) kit from Wako Life Sciences according to the manufacturer's instructions. In brief, in the presence of ATP and CoA, the nonesterified fatty acids were treated with acyl-CoA synthase, which leads to the production of acyl-CoA. Subsequently, the acyl-CoA oxidase is added to oxidize acyl-CoA to produce hydrogen peroxide. In the presence of peroxidase, hydrogen peroxide allows for the oxidative condensation of 3-methyl-N-ethyl-N-( $\beta$ -hydroxyethyl)-aniline with 4-aminoantipyrine to form a purple-colored end product with an absorption maximum at 550 nm. Therefore, the amount of fatty acids in the medium can be determined from the optical density measured at 550 nm.



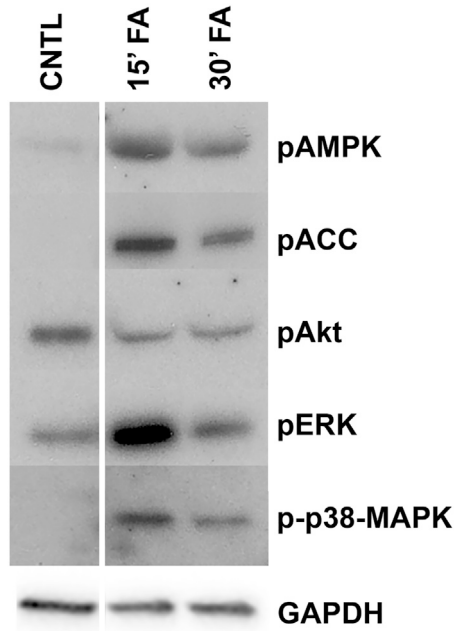

**Figure 7. Fatty Acid Treatment Activates Multiple Intracellular Signal Pathways**

Western blots for the phosphoprotein level in control, 15-min, and 30-min fatty acid-treated hPSC-CMs.

For measurement of intracellular fatty acid content, cardiomyocytes were grown in 10 cm<sup>2</sup> plates, treated with fatty acids for 2 weeks, collected in PBS, and homogenized at 4°C with Bullet Blender at maximum speed. A small aliquot was taken for protein concentration measurement. Lipids were extracted with 2:1 chloroform/methanol. The organic fraction was evaporated under nitrogen and reconstituted in isopropanol with 0.5% Triton X-100. Non-esterified fatty acids were measured with the WAKO NEFA-HR (Kanno et al., 2004) assay according to manufacturer's instructions. The fatty acid content was normalized to protein concentration.

### Immunocytochemistry

Cells were fixed in 4% paraformaldehyde for 15 min followed by a PBS wash. The fixed cells were blocked with 1.5% normal goat serum for 1 h at room temperature and incubated overnight at 4°C with primary antibody (mouse anti- $\alpha$ -actinin from Sigma, #A7811). The cells were then washed with PBS and incubated with a goat-anti-mouse secondary antibody for 1 h at room temperature. Samples subjected to F-actin staining were incubated with TRITC-labeled phalloidin (Thermo Fisher Scientific, R415) for 20 min at room temperature. Nuclei were stained with Hoechst 33342.

### Imaging and Morphological Analysis

Fluorescent images were acquired using a Zeiss AxioCam mounted on a Zeiss AxioObserver microscope, and confocal images were processed and quantified using NIS Elements. Each cell was analyzed for cell size and circularity index. To calculate sarcomere

length, we selected myofibrils with at least ten continuous well-recognized  $\alpha$ -actinin-positive bands and divided the length value by the number of sarcomeres.

### Western Blotting

Total protein was acquired from control cardiomyocytes or cardiomyocytes after 15 and 30 min of fatty acid treatment and subjected to SDS-PAGE. The lanes were loaded with equal amount of protein and were checked by Ponceau S staining. After blocking with milk, the membranes were incubated with anti-phospho-AMPK (2535S), anti-phospho-ACC (3661S), anti-phospho-Akt (4051S), anti-phospho-ERK (9106S), anti-phospho-p38 MAPK antibodies (9211S) (Cell Signaling Technologies), or anti-GAPDH mouse monoclonal antibody (Abcam, ab8245) overnight while shaking at 4°C. After incubation with anti-mouse (for phospho-Akt, phospho-ERK, and GAPDH) or anti-rabbit (for phospho-AMPK, phospho-p38-MAPK, and phospho-ACC) horseradish peroxidase (HRP)-coupled secondary antibody (Santa Cruz Biotechnology, sc-2031 for goat anti-mouse immunoglobulin G [IgG]-HRP and sc-2004 for goat anti-rabbit IgG-HRP), bands were visualized with SuperSignal West Femto Trial Kit (Thermo Scientific).

### Contractile Force Measurement

Arrays of silicone microposts were fabricated by casting polydimethylsiloxane (PDMS) from a silicon wafer with patterned SU8 features as previously described (Tan et al., 2003). The microposts used in this study were 6.45  $\mu$ m in height and 2.3  $\mu$ m in diameter, and the center-to-center spacing between adjacent microposts was 6  $\mu$ m. The stiffness of each micropost, which was based on the dimensions of the microposts and the material properties of PDMS, was 38.4 nN/ $\mu$ m. To enable cell attachment, we stamped the tips of these microposts with 50  $\mu$ g/mL of mouse laminin (Life Technologies) via microcontact printing, while the remaining surfaces of the micropost array were fluorescently stained with BSA conjugates with Alexa Fluor 594 and blocked with 0.2% Pluronic F-127 (in PBS) (Sniadecki and Chen, 2007). Twenty days following differentiation, hiPSC-derived cardiomyocytes were seeded onto the arrays at a density of 250,000/cm<sup>2</sup>. One week after fatty acid treatment, individual cardiomyocyte twitch forces were recorded under phase light using high-speed video microscopy as previously described (Rodriguez et al., 2014). Only the contractile forces of single cardiomyocytes (no junctions with adjacent cells) with obvious beating activity were assessed. The experiments were performed in a live cell chamber at 37°C with 15 mM HEPES-containing medium. Post deflections were optically measured at 100–150 frames/s using phase-contrast microscopy on a Nikon Ti-E upright microscope with a 60 $\times$  water immersion objective. A custom-written MATLAB code was used to compare each time frame of the video with a reference fluorescent image of the base plane of the posts. Twitch forces were subsequently calculated by multiplying the deflection of the posts by the bending stiffness of the microposts:

$$F = k\delta, \quad (\text{Equation 1})$$

where  $F$  is the force at a single micropost,  $k$  is the post's bending stiffness (38.4 nN/ $\mu$ m), and  $\delta$  is the horizontal distance between the centroid of the post's tip and the centroid of the post's base.

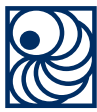

The total twitch force was then determined by adding together the forces measured at each post beneath the individual cardiomyocytes.

### Calcium Imaging

Intracellular calcium content was measured using the ratiometric indicator dye Fura-2 AM as described previously (Korte et al., 2011). For this assay, cardiomyocytes were replated onto fibronectin-coated glass slides, after which the cardiomyocytes were subsequently treated for 2 weeks. On the experimental day, cells were incubated in 0.2  $\mu$ M Fura-2 AM dye for 20 min at 37°C and washed with PBS. Stimulated calcium transients (1 Hz) were then recorded with the Ionoptix Stepper Switch system coupled to a Nikon inverted fluorescence microscope. The fluorescence signal was acquired using a 40 $\times$  Olympus objective and passed through a 510-nm filter, and the signal was quantified using a photomultiplier tube. The experiments were done at 37°C with Tyrode's solution containing 0.6 mM calcium chloride to more closely match the calcium concentration in RPMI medium.

### Mitochondria Functional Assay

The Seahorse XF96 extracellular flux analyzer was used to assess mitochondria function. The plates were pretreated with 0.1% gelatin. At around 20 days after differentiation, the cardiomyocytes were seeded onto the plates with a density of 30,000 per XF96 well (2,500/mm<sup>2</sup>). The cells were treated with fatty acids for 2 weeks in the Seahorse plates before the assay. Culture medium was exchanged for base medium (unbuffered DMEM, Sigma D5030, supplemented with 2 mM glutamine) without fatty acids 1 h before the assay and for the duration of the measurement. Substrates and selective inhibitors were injected during the measurements to achieve final concentrations of glucose at 25 mM, oligomycin at 2.5  $\mu$ M, FCCP at 1  $\mu$ M, rotenone at 2.5  $\mu$ M, and antimycin A at 2.5  $\mu$ M. The OCR values were further normalized to the number of cells present in each well, quantified by the Hoechst staining (Hoechst 33342; Sigma-Aldrich) as measured using fluorescence at 355 nm excitation and 460 nm emission. The mitochondrial respiratory reserve capacity was calculated by the difference between FCCP and baseline OCR values. Due to variations in the absolute magnitude of OCR measurements in different experiments, the relative fatty acid-treated/untreated control levels were used to compare and summarize independent biological replicates (n = 6).

### mRNA-Sequencing Analysis

RNA was extracted using an RNeasy mini kit (Qiagen). The RNA library was prepared using TruSeq library preparation kits (Illumina) following the manufacturer's protocols. The samples were sequenced on 20–25 million coverage. Raw sequences were first trimmed for any adapter and mapped to hg19 reference genome. RNA-sequencing results were aligned to Ensembl GRCh37 using TopHat (Trapnell et al., 2009) (version 2.0.13). Gene-level read counts were quantified using htseq-count (Anders et al., 2015) using Ensembl GRCh 37 gene annotations. Differential gene-expression analysis was performed using DESeq (Anders and Huber, 2010) and topGO R package (Alexa et al., 2006), with Fisher's exact test used for GO enrichment analysis.

### qRT-PCR

Total RNA was isolated using the Qiagen RNeasy kit, and mRNA was reverse transcribed using the Superscript III first-strand cDNA synthesis kit (Invitrogen). All primers were purchased from Real Time Primers, and qRT-PCR was performed using SYBR Green chemistry and an ABI 7900HT instrument. Samples were normalized using HPRT (hypoxanthine-guanine phosphoribosyltransferase) as a housekeeping gene. The sequences of the primers are listed in Table S1.

### Whole-Cell Current-Clamp Recording

At 20 days following cardiac differentiation, hPSC-CMs were dispersed using trypsin-EDTA and replated at low density onto fibronectin-coated glass coverslips. After 2 weeks of fatty acid treatment, the spontaneously generated action potentials were recorded using an Axopatch 200B amplifier (Axon Instruments, Foster City, CA, USA), operated in current-clamp mode. Temperature was maintained at 36°C  $\pm$  1°C by a Warner Instruments TC-324B Single Channel Automatic Heater Controller. The bath solution for recordings contained 136 mM NaCl, 4 mM KCl, 1 mM CaCl<sub>2</sub>, 2 mM MgCl<sub>2</sub>, 10 mM HEPES, and 10 mM glucose (pH 7.40 with NaOH); the pipette solution contained 135 mM KCl, 1 mM MgCl<sub>2</sub>, 10 mM EGTA, 10 mM HEPES, and 5 mM glucose (pH 7.20 with KOH). Patch electrodes were pulled from borosilicate glass capillaries using a Puller (PC-10, Narishige, Tokyo, Japan). Pipette resistance ranged from 2 to 4 M $\Omega$  when filled with the internal solution. The experiments were controlled by using Clampex 10.3 software (Axon Instruments). Data analysis was done by using Clampfit 10.3 (Axon Instruments). Parameters for data analysis included APD<sub>50</sub> (action potential duration at 50% repolarization), APD<sub>90</sub> (action potential duration at 90% repolarization), mean diastolic potential (MDP), APA (action potential amplitude), and maximal upstroke velocity. Cell membrane capacitance was measured by applying a  $\pm$ 10 mV pulse starting from a holding potential of  $-70$  mV.

### Statistics

Data are expressed as mean  $\pm$  SEM. Statistical analysis was performed using Student's t test. A p value of less than 0.05 was considered significantly different.

### ACCESSION NUMBERS

Raw RNA-sequencing data have been deposited in the Gene Expression Omnibus (accession number GEO: GSE124057).

### SUPPLEMENTAL INFORMATION

Supplemental Information can be found online at <https://doi.org/10.1016/j.stemcr.2019.08.013>.

### AUTHOR CONTRIBUTIONS

X.Y. and C.E.M. conceived experiments; X.Y., M.L.R., A.L., L.S., K.A.F., J.R., L.Z., and S.C.K. performed experiments and analyzed data; Y.W. analyzed data; N.J.S., R.T., H.R., H.X., and C.E.M. supervised experimental work; C.E.M. obtained research funding; X.Y. wrote the manuscript; M.L.R., A.L., Y.W., J.R., S.C.Z., L.P., H.R., N.J.S., R.T., H.R.B., H.X., and C.E.M. edited the manuscript.



## CONFLICTS OF INTERESTS

C.E.M. is a scientific founder and equity holder in Cytocardia. N.J.S. is co-founder and equity holder in Stasys Medical Corporation.

## ACKNOWLEDGMENTS

We are thankful for the assistance from Dr. Stephen R. Coats (Department of Periodontics, University of Washington) for the endotoxin assay. This work was supported by the National Institutes of Health grants R01HL146868, R01HL128362, R01HL128368, U54DK107979, P01HL094374 (all to C.E.M.), P01GM081619 (to C.E.M. and H.R.-B.), and a grant from the Fondation Leducq Transatlantic Network of Excellence (to C.E.M.). X.Y. was supported by the American Heart Association post-doctoral scholarship 12POST11940060 and 14POST20310023. M.L.R. was supported by an NSF Graduate Research Fellowship 2011126228. J.R. was supported by a post-doctoral fellowship from German Research Foundation (DFG) RI 2764/1-1. N.J.S. has an NSF CAREER award CMMI-0846780. R.T. is supported by the National Institutes of Health grant R01HL129510.

Received: January 18, 2017

Revised: August 23, 2019

Accepted: August 26, 2019

Published: September 26, 2019

## REFERENCES

- Alexa, A., Rahnenfuhrer, J., and Lengauer, T. (2006). Improved scoring of functional groups from gene expression data by decorrelating GO graph structure. *Bioinformatics* *22*, 1600–1607.
- Amri, E.Z., Bonino, F., Ailhaud, G., Abumrad, N.A., and Grimaldi, P.A. (1995). Cloning of a protein that mediates transcriptional effects of fatty acids in preadipocytes. Homology to peroxisome proliferator-activated receptors. *J. Biol. Chem.* *270*, 2367–2371.
- Anders, S., and Huber, W. (2010). Differential expression analysis for sequence count data. *Genome Biol.* *11*, R106.
- Anders, S., Pyl, P.T., and Huber, W. (2015). HTSeq—a Python framework to work with high-throughput sequencing data. *Bioinformatics* *31*, 166–169.
- Bakrania, B., Granger, J.P., and Harmancey, R. (2016). Methods for the determination of rates of glucose and fatty acid oxidation in the isolated working rat heart. *J. Vis. Exp.* *115*. <https://doi.org/10.3791/54497>.
- Birket, M.J., Ribeiro, M.C., Kosmidis, G., Ward, D., Leitoguinho, A.R., van de Pol, V., Dambrot, C., Devalla, H.D., Davis, R.P., Mastroberardino, P.G., et al. (2015). Contractile defect caused by mutation in MYBPC3 revealed under conditions optimized for human PSC-cardiomyocyte function. *Cell Rep.* *13*, 733–745.
- Brewer, G.J., and Cotman, C.W. (1989). Survival and growth of hippocampal neurons in defined medium at low density: advantages of a sandwich culture technique or low oxygen. *Brain Res.* *494*, 65–74.
- Correia, C., Koshkin, A., Duarte, P., Hu, D., Teixeira, A., Domian, I., Serra, M., and Alves, P.M. (2017). Distinct carbon sources affect structural and functional maturation of cardiomyocytes derived from human pluripotent stem cells. *Sci. Rep.* *7*, 8590.
- Feaster, T.K., Cadar, A.G., Wang, L., Williams, C.H., Chun, Y.W., Hempel, J.E., Bloodworth, N., Merryman, W.D., Lim, C.C., Wu, J.C., et al. (2015). Matrigel mattress: a method for the generation of single contracting human-induced pluripotent stem cell-derived cardiomyocytes. *Circ. Res.* *117*, 995–1000.
- Gibson, R.A., and Kneebone, G.M. (1981). Fatty acid composition of human colostrum and mature breast milk. *Am. J. Clin. Nutr.* *34*, 252–257.
- Guarner, V., Contreras, K., and Carbo, R. (2002). Effect of glucose and fatty acid availability on neonatal and adult heart contractility. *Biol. Neonate* *82*, 39–45.
- Hardell, L.I., and Walldius, G. (1980). Fatty acid composition of human serum lipids at birth. *Ups. J. Med. Sci.* *85*, 45–58.
- Hazeltine, L.B., Simmons, C.S., Salick, M.R., Lian, X., Badur, M.G., Han, W., Delgado, S.M., Wakatsuki, T., Crone, W.C., Pruitt, B.L., et al. (2012). Effects of substrate mechanics on contractility of cardiomyocytes generated from human pluripotent stem cells. *Int. J. Cell Biol.* *2012*, 508294.
- Hofsteen, P., Robitaille, A.M., Chapman, D.P., Moon, R.T., and Murry, C.E. (2016). Quantitative proteomics identify DAB2 as a cardiac developmental regulator that inhibits WNT/beta-catenin signaling. *Proc. Natl. Acad. Sci. U S A* *113*, 1002–1007.
- Hu, D., Linders, A., Yamak, A., Correia, C., Kijlstra, J.D., Garakani, A., Xiao, L., Milan, D.J., van der Meer, P., Serra, M., et al. (2018). Metabolic maturation of human pluripotent stem cell-derived cardiomyocytes by inhibition of HIF1alpha and LDHA. *Circ. Res.* *123*, 1066–1079.
- Hue, L., and Taegtmeier, H. (2009). The Randle cycle revisited: a new lead for an old hat. *Am. J. Physiol. Endocrinol. Metab.* *297*, E578–E591.
- Kanno, S., Kim, P.K., Sallam, K., Lei, J., Billiar, T.R., and Shears, L.L., 2nd. (2004). Nitric oxide facilitates cardiomyogenesis in mouse embryonic stem cells. *Proc. Natl. Acad. Sci. U S A* *101*, 12277–12281.
- Karimata, T., Sato, D., Seya, D., Sato, D., Wakatsuki, T., Feng, Z., Nishina, A., Kusunoki, M., and Nakamura, T. (2013). Fatty acid composition in fetal, neonatal, and cultured cardiomyocytes in rats. *In Vitro Cell. Dev. Biol. Anim.* *49*, 798–804.
- Kliewer, S.A., Sundseth, S.S., Jones, S.A., Brown, P.J., Wisely, G.B., Koble, C.S., Devchand, P., Wahli, W., Willson, T.M., Lenhard, J.M., et al. (1997). Fatty acids and eicosanoids regulate gene expression through direct interactions with peroxisome proliferator-activated receptors alpha and gamma. *Proc. Natl. Acad. Sci. U S A* *94*, 4318–4323.
- Korte, E.S., Dai, J., Buckley, K., Feast, E.R., Adamek, N., Geeves, M.A., Murry, C.E., and Regnier, M. (2011). Upregulation of cardiomyocyte ribonucleotide reductase increases intracellular 2 deoxy-ATP, contractility, and relaxation. *J. Mol. Cell. Cardiol.* *51*, 894–901.
- Kosmidis, G., Bellin, M., Ribeiro, M.C., van Meer, B., Ward-van Oostwaard, D., Passier, R., Tertoolen, L.G., Mummery, C.L., and Casini, S. (2015). Altered calcium handling and increased contraction force in human embryonic stem cell derived cardiomyocytes



- following short term dexamethasone exposure. *Biochem. Biophys. Res. Commun.* 467, 998–1005.
- Kuppusamy, K.T., Jones, D.C., Sperber, H., Madan, A., Fischer, K.A., Rodriguez, M.L., Pabon, L., Zhu, W.Z., Tulloch, N.L., Yang, X., et al. (2015). Let-7 family of microRNA is required for maturation and adult-like metabolism in stem cell-derived cardiomyocytes. *Proc. Natl. Acad. Sci. U S A* 112, E2785–E2794.
- Lee, D.S., Chen, J.H., Lundy, D.J., Liu, C.H., Hwang, S.M., Pabon, L., Shieh, R.C., Chen, C.C., Wu, S.N., Yan, Y.T., et al. (2015). Defined microRNAs induce aspects of maturation in mouse and human embryonic-stem-cell-derived cardiomyocytes. *Cell Rep.* 12, 1960–1967.
- Lundy, S.D., Zhu, W.Z., Regnier, M., and Laflamme, M.A. (2013). Structural and functional maturation of cardiomyocytes derived from human pluripotent stem cells. *Stem Cell Dev.* 22, 1991–2002.
- Maillet, M., van Berlo, J.H., and Molkenin, J.D. (2013). Molecular basis of physiological heart growth: fundamental concepts and new players. *Nat. Rev. Mol. Cell Biol.* 14, 38–48.
- Makinde, A.O., Kantor, P.F., and Lopaschuk, G.D. (1998). Maturation of fatty acid and carbohydrate metabolism in the newborn heart. *Mol. Cell. Biochem.* 188, 49–56.
- Miller, T.A., LeBrasseur, N.K., Cote, G.M., Trucillo, M.P., Pimentel, D.R., Ido, Y., Ruderman, N.B., and Sawyer, D.B. (2005). Oleate prevents palmitate-induced cytotoxic stress in cardiac myocytes. *Biochem. Biophys. Res. Commun.* 336, 309–315.
- Mills, R.J., Titmarsh, D.M., Koenig, X., Parker, B.L., Ryall, J.G., Quaipe-Ryan, G.A., Voges, H.K., Hodson, M.P., Ferguson, C., Drowley, L., et al. (2017). Functional screening in human cardiac organoids reveals a metabolic mechanism for cardiomyocyte cell cycle arrest. *Proc. Natl. Acad. Sci. U S A* 114, E8372–E8381.
- Miyaoka, Y., Chan, A.H., Judge, L.M., Yoo, J., Huang, M., Nguyen, T.D., Lizarraga, P.P., So, P.L., and Conklin, B.R. (2014). Isolation of single-base genome-edited human iPS cells without antibiotic selection. *Nat. Methods* 11, 291–293.
- Nunes, S.S., Miklas, J.W., Liu, J., Aschar-Sobbi, R., Xiao, Y., Zhang, B., Jiang, J., Masse, S., Gagliardi, M., Hsieh, A., et al. (2013). Biowire: a platform for maturation of human pluripotent stem cell-derived cardiomyocytes. *Nat. Methods* 10, 781–787.
- Parikh, S.S., Blackwell, D.J., Gomez-Hurtado, N., Frisk, M., Wang, L., Kim, K., Dahl, C.P., Fiane, A., Tonnessen, T., Kryshtal, D.O., et al. (2017). Thyroid and glucocorticoid hormones promote functional T-tubule development in human-induced pluripotent stem cell-derived cardiomyocytes. *Circ. Res.* 121, 1323–1330.
- Ribeiro, M.C., Tertoolen, L.G., Guadix, J.A., Bellin, M., Kosmidis, G., D’Aniello, C., Monshouwer-Kloots, J., Goumans, M.J., Wang, Y.L., Feinberg, A.W., et al. (2015). Functional maturation of human pluripotent stem cell derived cardiomyocytes in vitro—correlation between contraction force and electrophysiology. *Biomaterials* 51, 138–150.
- Riquelme, C.A., Magida, J.A., Harrison, B.C., Wall, C.E., Marr, T.G., Secor, S.M., and Leinwand, L.A. (2011). Fatty acids identified in the Burmese python promote beneficial cardiac growth. *Science* 334, 528–531.
- Rodriguez, M.L., Graham, B.T., Pabon, L.M., Han, S.J., Murry, C.E., and Sniadecki, N.J. (2014). Measuring the contractile forces of human induced pluripotent stem cell-derived cardiomyocytes with arrays of microposts. *J. Biomech. Eng.* 136, 051005.
- Ronaldson-Bouchard, K., Ma, S.P., Yeager, K., Chen, T., Song, L., Sirabella, D., Morikawa, K., Teles, D., Yazawa, M., and Vunjak-Novakovic, G. (2018). Advanced maturation of human cardiac tissue grown from pluripotent stem cells. *Nature* 556, 239–243.
- Ruan, J.L., Tulloch, N.L., Saiget, M., Paige, S.L., Razumova, M.V., Regnier, M., Tung, K.C., Keller, G., Pabon, L., Reinecke, H., et al. (2015). Mechanical stress promotes maturation of human myocardium from pluripotent stem cell-derived progenitors. *Stem Cells* 33, 2148–2157.
- Sanchez-Reyes, O.B., Romero-Avila, M.T., Castillo-Badillo, J.A., Takei, Y., Hirasawa, A., Tsujimoto, G., Villalobos-Molina, R., and Garcia-Sainz, J.A. (2014). Free fatty acids and protein kinase C activation induce GPR120 (free fatty acid receptor 4) phosphorylation. *Eur. J. Pharmacol.* 723, 368–374.
- Sartiani, L., Bettiol, E., Stillitano, F., Mugelli, A., Cerbai, E., and Jaconi, M.E. (2007). Developmental changes in cardiomyocytes differentiated from human embryonic stem cells: a molecular and electrophysiological approach. *Stem Cells* 25, 1136–1144.
- Sniadecki, N.J., and Chen, C.S. (2007). Microfabricated silicone elastomeric post arrays for measuring traction forces of adherent cells. In *Methods in Cell Biology: Cell Mechanics*, Y. Wang and D.E. Discher, eds. (Elsevier Inc.), pp. 313–328.
- Tan, J.L., Tien, J., Pirone, D.M., Gray, D.S., Bhadriraju, K., and Chen, C.S. (2003). Cells lying on a bed of microneedles: an approach to isolate mechanical force. *Proc. Natl. Acad. Sci. U S A* 100, 1484–1489.
- Trapnell, C., Pachter, L., and Salzberg, S.L. (2009). TopHat: discovering splice junctions with RNA-Seq. *Bioinformatics* 25, 1105–1111.
- Tulloch, N.L., Muskheli, V., Razumova, M.V., Korte, F.S., Regnier, M., Hauch, K.D., Pabon, L., Reinecke, H., and Murry, C.E. (2011). Growth of engineered human myocardium with mechanical loading and vascular coculture. *Circ. Res.* 109, 47–59.
- Watson, S.J., Brown, A.J., and Holliday, N.D. (2012). Differential signaling by splice variants of the human free fatty acid receptor GPR120. *Mol. Pharmacol.* 81, 631–642.
- Watt, M.J., Steinberg, G.R., Chen, Z.P., Kemp, B.E., and Febbraio, M.A. (2006). Fatty acids stimulate AMP-activated protein kinase and enhance fatty acid oxidation in L6 myotubes. *J. Physiol.* 574, 139–147.
- Yang, X., Pabon, L., and Murry, C.E. (2014a). Engineering adolescence: maturation of human pluripotent stem cell-derived cardiomyocytes. *Circ. Res.* 114, 511–523.
- Yang, X., Rodriguez, M., Pabon, L., Fischer, K.A., Reinecke, H., Regnier, M., Sniadecki, N.J., Ruohola-Baker, H., and Murry, C.E. (2014b). Tri-iodo-L-thyronine promotes the maturation of human cardiomyocytes-derived from induced pluripotent stem cells. *J. Mol. Cell. Cardiol.* 72, 296–304.
- Yu, J., Vodyanik, M.A., Smuga-Otto, K., Antosiewicz-Bourget, J., Frane, J.L., Tian, S., Nie, J., Jonsdottir, G.A., Ruotti, V., Stewart, R., et al. (2007). Induced pluripotent stem cell lines derived from human somatic cells. *Science* 318, 1917–1920.

**Stem Cell Reports, Volume 13**

**Supplemental Information**

**Fatty Acids Enhance the Maturation of Cardiomyocytes Derived from Human Pluripotent Stem Cells**

**Xiulan Yang, Marita L. Rodriguez, Andrea Leonard, Lihua Sun, Karin A. Fischer, Yuliang Wang, Julia Ritterhoff, Limei Zhao, Stephen C. Kolwicz Jr., Lil Pabon, Hans Reinecke, Nathan J. Sniadecki, Rong Tian, Hannele Ruohola-Baker, Haodong Xu, and Charles E. Murry**

1 SUPPLEMENTAL INFORMATION

2 **Figures and Legends**

3

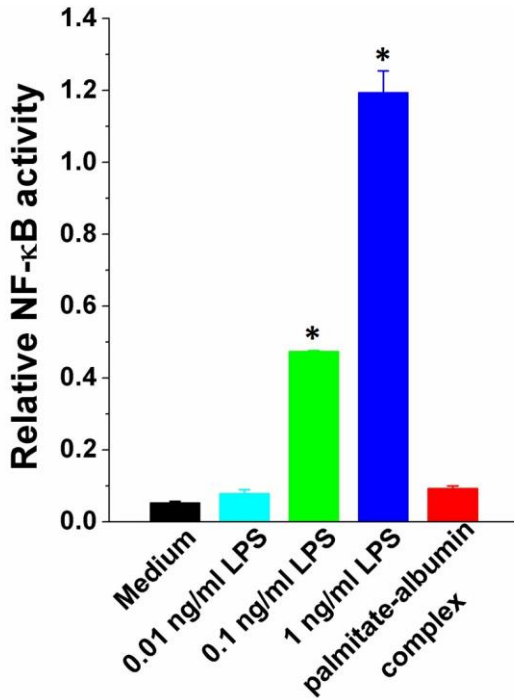

4

5

6 Figure S1. House-made palmitate-albumin complex is endotoxin-free, related to Results 2.1. HEK 293  
7 cells were treated with medium only or medium containing 0.01 ng/ml, 0.1 ng/ml, 1 ng/ml LPS or the self-  
8 made palmitate-albumin complexes. No significant endotoxin activity was observed in the medium  
9 containing palmitate-albumin complexes compared with medium only. The assay was performed three  
10 times on three different batches of palmitate-albumin complex. \* P<0.05 vs medium only. Data are  
11 represented as mean ± SEM.

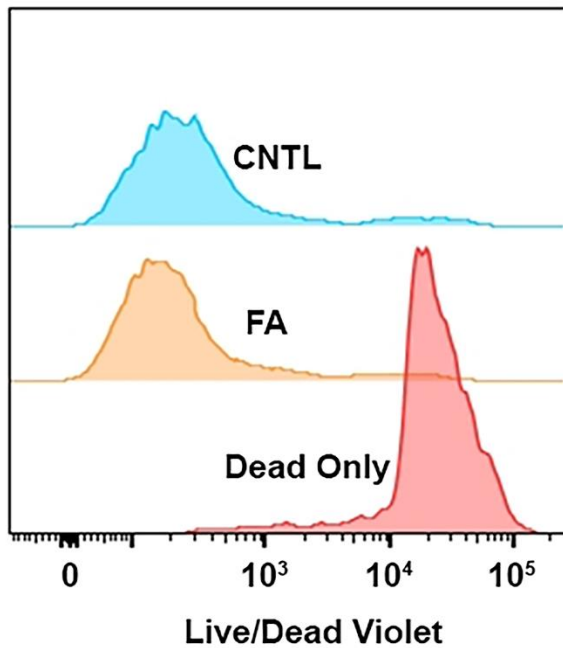

12

13 Figure S2. Fatty acids supplement does not lead to cell toxicity, related to Results 2.1. Live-dead assay  
 14 showed there was no difference in cell death between control and fatty acids-treated hPSC-CMs, two  
 15 weeks after treatment. The experiments were performed with cardiomyocytes from three different  
 16 cardiomyocyte differentiation runs and similar results were observed.

17

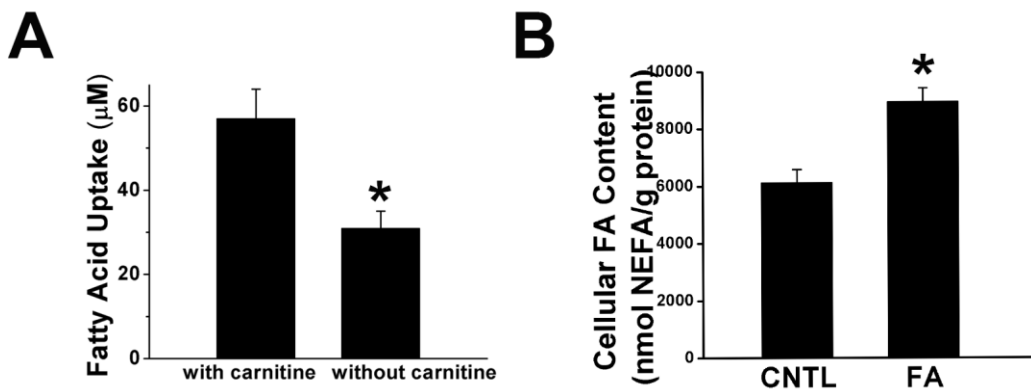

18

19 Figure S3. Cellular fatty acids uptake and cellular fatty acid content, related to Results 2.1. Panel A  
 20 showed cellular fatty acids uptake with or without carnitine added to the medium. B shows the intracellular

21 fatty acid content with and without FA treatment. Experiments were performed with cardiomyocytes from  
 22 three different differentiation runs, \* P< 0.05 between groups. Data are represented as mean ± SEM.

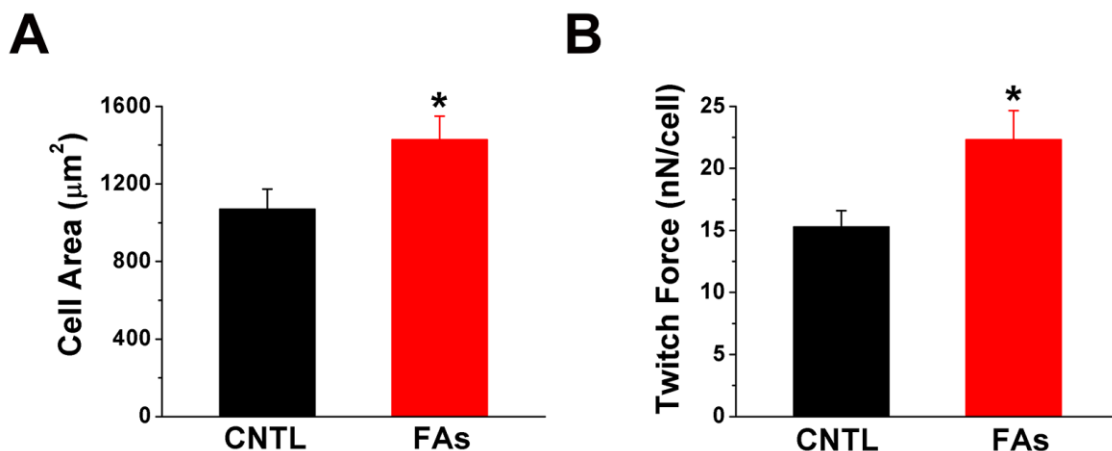

23  
 24 Figure S4. The effect of fatty acids treatment on cardiomyocytes derived from RUES cells, related to  
 25 Figure 1 and Figure 3. (A) Fatty acids treatment leads to hypertrophy of cardiomyocytes-derived from  
 26 RUES2 embryonic stem line, n>170 from 3 different cardiomyocyte differentiation runs. Data are  
 27 represented as mean ± SEM. \* P<0.05. (B) Fatty acids treatment significantly increases the contractile  
 28 force of cardiomyocytes-derived from RUES2 embryonic stem line. n = 26 for control hPSC-CMs and n =  
 29 28 for fatty acid-treated hPSC-CMs from 3 different cardiomyocyte differentiation runs. Data are  
 30 represented as mean ± SEM. \* P<0.05 vs. control hPSC-CMs.

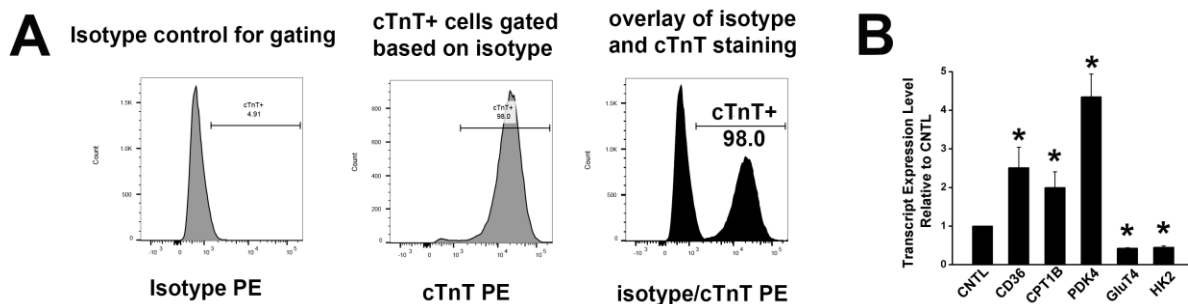

31  
 32 Figure S5. The effect of cardiomyocyte purity on gene expression levels, related to Figure 6. A shows a  
 33 representative flow cytometry analysis for a cardiac differentiation run which has a cardiomyocyte purity of  
 34 98%. B shows Q-PCR assay after treating the high purity cardiomyocytes with fatty acids. The  
 35 experiments were performed three times with cardiomyocytes from three different differentiation runs.  
 36 Data are represented as mean ± SEM. \* P<0.05 vs. control hPSC-CMs.

37



38 Table S1. Primer sequences for Q-PCR assay, related to Figure 6.

| Transcripts                    | Forward Primer Sequence | Reverse Primer Sequence |
|--------------------------------|-------------------------|-------------------------|
| <i>HPRT</i>                    | TGACACTGGCAAACAATGCA    | GGTCCTTTTCACCAGCAAGCT   |
| <i>CD36</i>                    | TCTTTCCTGCAGCCCAATG     | AGCCTCTGTTCCAAGTATAGTGA |
| <i>CPT1B</i>                   | ACATCTCTGCCCAAGCTTCC    | ACCATGACTTGAGCACCAGG    |
| <i>PDK4</i>                    | AGAGGTGGAGCATTCTCGC     | ATGTTGGCGAGTCTCACAGG    |
| <i>Glut4</i>                   | CTCGATCCGACTCGGGAAAG    | CGCTGCTGAGGGGGTTC       |
| <i>HK2</i> (Wolf et al., 2011) | CAAAGTGACAGTGGGTGTGG    | GCCAGGTCCTTCACTGTCTC    |

39

40 *HPRT* (hypoxanthine-guanine phosphoribosyltransferase), *CD36* (fatty acid translocase), *CPT1B*  
 41 (Carnitine palmitoyltransferase 1A), *PDK4* (pyruvate dehydrogenase kinase-4), *Glut4* (glucose  
 42 transporter 4), *HK2* (hexokinase 2).

43

44 Table S2. Electrophysiological parameters for control and FA-treated IMR90-CMs, related to Figure 4.

45

|                              | CNTL                | FA-treated           |
|------------------------------|---------------------|----------------------|
| N                            | 24                  | 25                   |
| Beating rate(bpm)            | 124.45 ± 16.55      | 115.24 ± 13.20       |
| dV/dt <sub>max</sub> (V/sec) | 23.55 ± 1.80        | 37.01 ± 5.74*        |
| MDP(mV)                      | -58.28 ± 1.51       | -58.84 ± 1.99        |
| APA(mV)                      | 88.23 ± 3.06        | 90.69 ± 3.75         |
| APD50 (ms)                   | 255.61 ± 41.49      | 281.86 ± 35.21       |
| APD90 (ms)                   | 316.33 ± 46.71      | 343.33 ± 35.52       |
| Cm(pF)                       | 59.56 ± 4.69 (n=14) | 73.73 ± 4.60 (n=15)* |

46

47 N, cell number (from 3 different directed differentiation runs); dV/dt<sub>max</sub>, maximum rate of action potential  
 48 upstroke; MDP, maximum diastolic potential; APA indicates action potential amplitude; APD50, action

49 potential duration measured at 50% repolarization; APD90, action potential duration measured at 90%  
50 repolarization; Cm, membrane capacitance; Data were obtained from 3 different cardiomyocyte  
51 differentiation runs. For control group n = 24 and n = 25 for FA-treated group. \*P<0.05 between control  
52 and FA-treated IMR90-CMs.

## 53 **Supplemental Experimental Procedures**

### 54 **1. Endotoxin assay on the self-made palmitate-albumin complexes**

55 Endotoxin levels in palmitate-albumin complexes were tested by performing HEK293 cell Toll-like  
56 Receptor (TLR4) activation assays (Coats et al., 2011). Briefly, HEK293 cells grown in DMEM 10%FBS  
57 were plated in 96-well plates at a density of  $4 \times 10^4$  cells per well, and transfected the following day with  
58 plasmids bearing fire-fly luciferase, Renilla luciferase, human HATLR4, MD-2 (lymphocyte antigen 96),  
59 and mCD14 by standard calcium phosphate precipitation. Twenty-two hours after transfection, cells were  
60 stimulated with the different samples listed in Figure S1, each in triplicate, for 4 hours at 37°C with the  
61 indicated doses and different concentrations of E.coli lipopolysaccharides (LPS) suspended in DMEM/  
62 5%FBS following stimulation. The transfected HEK293 cells were rinsed with phosphate-buffered saline  
63 and lysed with 50  $\mu$ l of passive lysis buffer (Promega, Madison, WI). Luciferase activity was measured  
64 using the Dual Luciferase Assay Reporter System (Promega, Madison, WI). Data are expressed as  
65 relative NF- $\kappa$ B-activity, which represents the ratio of NF- $\kappa$ B-dependent fire-fly luciferase activity to  $\beta$ -Actin  
66 promoter-dependent Renilla luciferase activity.

67

### 68 **2. Flow cytometry live dead assay**

69 The hPSC-CMs were treated with fatty acids for two days and the lipid toxicity was determined by  
70 live/dead fixable dead cell stain kit from Invitrogen. The control dead cells were obtained by putting the  
71 cells into 60°C water bath for half an hour.

72

### 73 **3. Fatty acid uptake and cellular fatty acid content**

74 The hPSC-CMs were treated with fatty acids for two days and cellular fatty acids uptake was measured  
75 using the HR Series NEFA-HR (2) kit from Wako Life Sciences as mentioned in the methods part of the  
76 main text. The hPSC-CMs were treated with fatty acids for two weeks and cells were homogenized and  
77 FA content was measured as described in the methods part of the main text.

78

### 79 **4. Cellular morphology and contractile force changes after FA exposure in cardiomyocytes-** 80 **derived from RUES2 embryonic stem cells**

81 Methods are similar with the methods with cardiomyocytes-derived from iMR90 cells, please refer to  
82 session 2.2, 2.4, 2.5, and 2.8 in the main text for details.

83

84 **5. Gene expression assay on high purity cardiomyocytes**

85 Q-PCR assay was done in the same way as described in the “Quantitative RT-PCR” part of the main text.

86

87 **Supplemental Table 1. Primer sequences for Q-PCR assay.**

88 **Supplemental Table 2. Electrophysiological parameters for control and FA-treated IMR90-CMs**

89

90

91 **Results**

92 **1. Endotoxin assay on self-made palmitate-albumin complexes**

93 To ensure that endotoxin was not introduced during the process of making palmitate-albumin complexes,  
94 endotoxin assay was performed in HEK293 cells. As shown in Figure S1, there was no introduced  
95 endotoxin activity in the palmitate-albumin samples, compared to the medium only sample. The same  
96 experiment was performed for three different batches of palmitate-albumin complexes and similar  
97 endotoxin activity was observed.

98

99 **2. Live dead assay after fatty acids treatment**

100 Intracellular accumulation of long chain fatty acids in non-adipose tissues is associated with cellular  
101 dysfunction and cell death. The toxic effect is mainly mediated by saturated fatty acids, in this study,  
102 potentially by palmitate, which may induce apoptosis through both ceramide-dependent(Dyntar et al.,  
103 2001) and ceramide-independent(Listenberger et al., 2001) pathways. It has also been reported that  
104 palmitate induces cell death through generating reactive oxygen species(Listenberger et al., 2001).  
105 Reports also showed that co-administration of unsaturated fatty acids inhibits the pro-apoptotic effects of  
106 saturated fatty acids(Miller et al., 2005; Tumova et al., 2015). In this study, both saturated and  
107 unsaturated fatty acids were utilized at a physiological ratio and concentration that is present in the  
108 newborn serum. Careful observation was made after fatty acids supplement and no cell death was  
109 noticed. Live-dead assay was performed after two weeks of fatty acids treatment, similar cell numbers  
110 were obtained from the fatty acids treated and untreated groups, and no cell death was detected (Figure  
111 S2).

112

113 **3. Fatty acids uptake and cellular fatty acid content**

114 After two days of feeding, cells take up  $57 \pm 7 \mu\text{M}$  of fatty acids with carnitine added. Without adding  
115 carnitine, cells take up  $31 \pm 4 \mu\text{M}$  of fatty acids (Figure S3A). At the end of the two weeks FA treatment,  
116 intracellular fatty acid content was measured and normalized to protein concentration. FA content is  
117 significantly increased after FA treatment ( $6118 \pm 461 \text{ nmol NEFA/g protein}$  in control vs  $8933 \pm 488 \text{ nmol}$   
118  $\text{NEFA/g protein}$  in FA-treated,  $n = 3$ ,  $P < 0.05$ , Figure S3B).

119 **4. The effect of fatty acids treatment on cardiomyocytes-derived from RUES 2 cell line**

120 In the cardiomyocytes derived from human Rockefeller University Embryonic Stem Cell Line 2, fatty acids  
121 treatment induced cellular hypertrophy ( $1071 \pm 102 \mu\text{m}^2$  for control cells vs.  $1430 \pm 119 \mu\text{m}^2$  after fatty  
122 acids treatment,  $P < 0.05$ , Figure S4A). Also, fatty acids treatment leads to increased contractile force  
123 ( $15.31 \pm 1.29 \text{ nN/cell}$  for control cells,  $n=26$ , vs.  $22.33 \pm 2.33 \text{ nN/cell}$  after fatty acids treatment,  $n=28$ ,  
124  $P < 0.05$ , Figure S4B).

125 **5. The effect of cardiomyocyte purity on gene expression levels**

126 As mentioned in the methods session, runs that have over 80% cardiomyocyte purity were used in this  
127 study, to exclude the effect of ~20% non-cardiomyocytes, high purity cardiomyocytes (over 95%) were  
128 used to perform the same Q-PCR assay and similar results was observed (Figure S5).

129

130 **Supplemental References**

131 Coats, S.R., Berezow, A.B., To, T.T., Jain, S., Bainbridge, B.W., Banani, K.P., and Darveau, R.P. (2011).  
132 The lipid A phosphate position determines differential host Toll-like receptor 4 responses to  
133 phylogenetically related symbiotic and pathogenic bacteria. *Infection and immunity* 79, 203-210.  
134 Dyntar, D., Eppenberger-Eberhardt, M., Maedler, K., Pruschy, M., Eppenberger, H.M., Spinas, G.A., and  
135 Donath, M.Y. (2001). Glucose and palmitic acid induce degeneration of myofibrils and modulate  
136 apoptosis in rat adult cardiomyocytes. *Diabetes* 50, 2105-2113.  
137 Listenberger, L.L., Ory, D.S., and Schaffer, J.E. (2001). Palmitate-induced apoptosis can occur through a  
138 ceramide-independent pathway. *The Journal of biological chemistry* 276, 14890-14895.  
139 Miller, T.A., LeBrasseur, N.K., Cote, G.M., Trucillo, M.P., Pimentel, D.R., Ido, Y., Ruderman, N.B., and  
140 Sawyer, D.B. (2005). Oleate prevents palmitate-induced cytotoxic stress in cardiac myocytes.  
141 *Biochemical and biophysical research communications* 336, 309-315.  
142 Tumova, J., Malisova, L., Andel, M., and Trnka, J. (2015). Protective Effect of Unsaturated Fatty Acids on  
143 Palmitic Acid-Induced Toxicity in Skeletal Muscle Cells is not Mediated by PPARdelta Activation. *Lipids*  
144 50, 955-964.  
145 Wolf, A., Agnihotri, S., Micallef, J., Mukherjee, J., Sabha, N., Cairns, R., Hawkins, C., and Guha, A.  
146 (2011). Hexokinase 2 is a key mediator of aerobic glycolysis and promotes tumor growth in human  
147 glioblastoma multiforme. *The Journal of experimental medicine* 208, 313-326.  
148
